# Supplementary material for: Exploring Structure-Activity Relationship in Tacrine-Squaramide Derivatives as Potent Cholinesterase Inhibitors
Source: PubMed Central journal article supplement (PMC6723352; doi:10.3390/biom9080379), 2019-08-19

# Exploring Structure-Activity Relationship in Tacrine-Squaramide Derivatives as Potent Cholinesterase Inhibitors

Barbora Svobodova,<sup>1,2,#</sup> Eva Mezeiova,<sup>1,2,3#</sup> Vendula Hepnarova,<sup>1,2</sup> Martina Hrabnova,<sup>1,2</sup> Lubica Muckova,<sup>1,2</sup> Tereza Koblrova,<sup>1</sup> Tomas Kucera,<sup>1</sup> Daniel Jun,<sup>1,2</sup> Ondrej Soukup,<sup>1,2</sup> María L. Jimeno,<sup>4</sup> José Marco-Contelles,<sup>3,\*</sup> and Jan Korabecny<sup>1,2,\*</sup>

<sup>1</sup> Department of Toxicology and Military Pharmacy, Faculty of Military Health Sciences, Trebesska 1575, 500 01 Hradec Kralove, Czech Republic

<sup>2</sup> Biomedical Research Centre, University Hospital Hradec Kralove, Sokolska 581, 500 05 Hradec Kralove, Czech Republic

<sup>3</sup> Laboratory of Medicinal Chemistry, Institute of General Organic chemistry, Juan de la Cierva 3, 28006-Madrid, Spain

<sup>4</sup> Centro de Química Orgánica "Lora-Tamayo" (CSIC), C/ Juan de la Cierva 3, 28006-Madrid, Spain

# Author contribution: B.S. and E.M. contributed equally.

\*Corresponding author: J.K - Phone: +420 973 255 167; e-mail: [jan.korabecny@fnhk.cz](mailto:jan.korabecny@fnhk.cz); E.M. – Phone: +420 973 255 167; e-mail: [eva.mezeiova@gmail.com](mailto:eva.mezeiova@gmail.com)

# $^1\text{H}$ and $^{13}\text{C}$ spectral copies of final products

Bis({2-[(1,2,3,4-tetrahydroacridin-9-yl)amino]ethyl}amino)cyclobut-3-ene-1,2-dione (3a)  $^1\text{H}$  NMR:

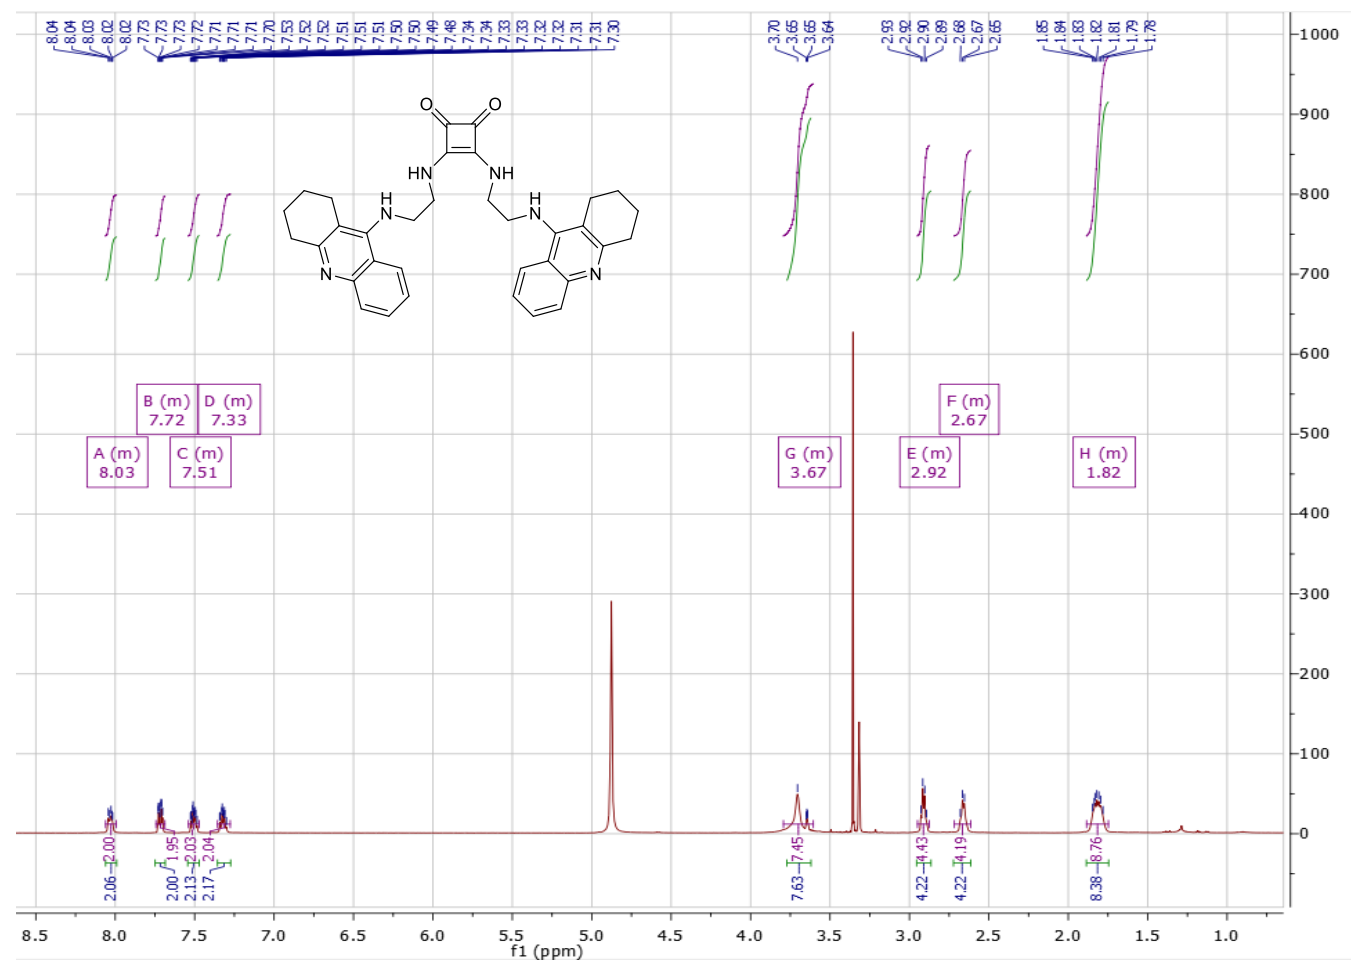

**Bis({2-[(1,2,3,4-tetrahydroacridin-9-yl)amino]ethyl}amino)cyclobut-3-ene-1,2-dione (3a) <sup>13</sup>C NMR:**

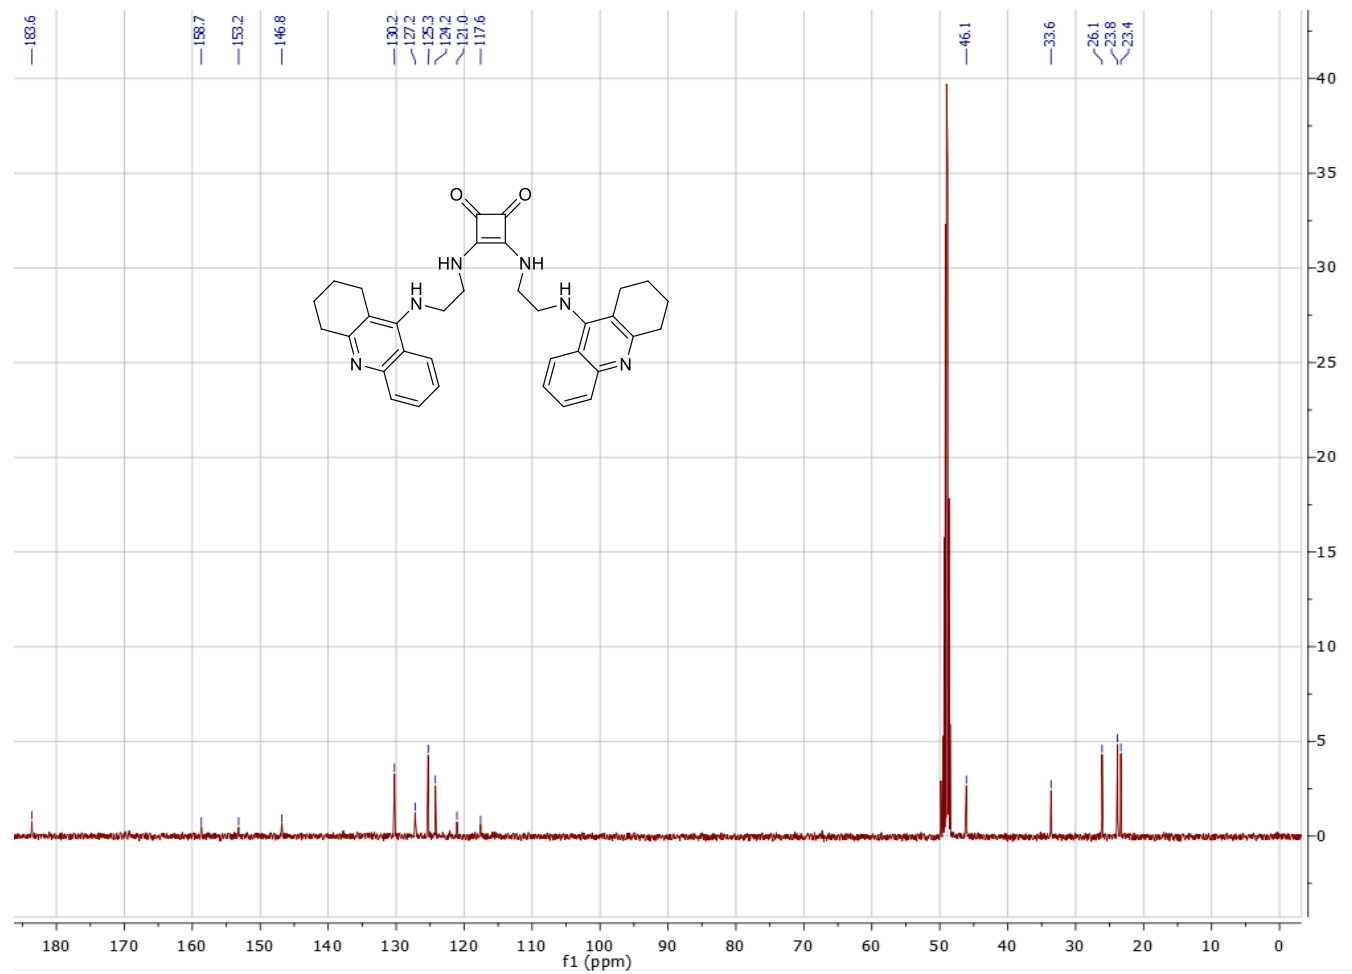

Bis({3-[(1,2,3,4-tetrahydroacridin-9-yl)amino]propyl}amino)cyclobut-3-ene-1,2-dione (3b) <sup>1</sup>H NMR:

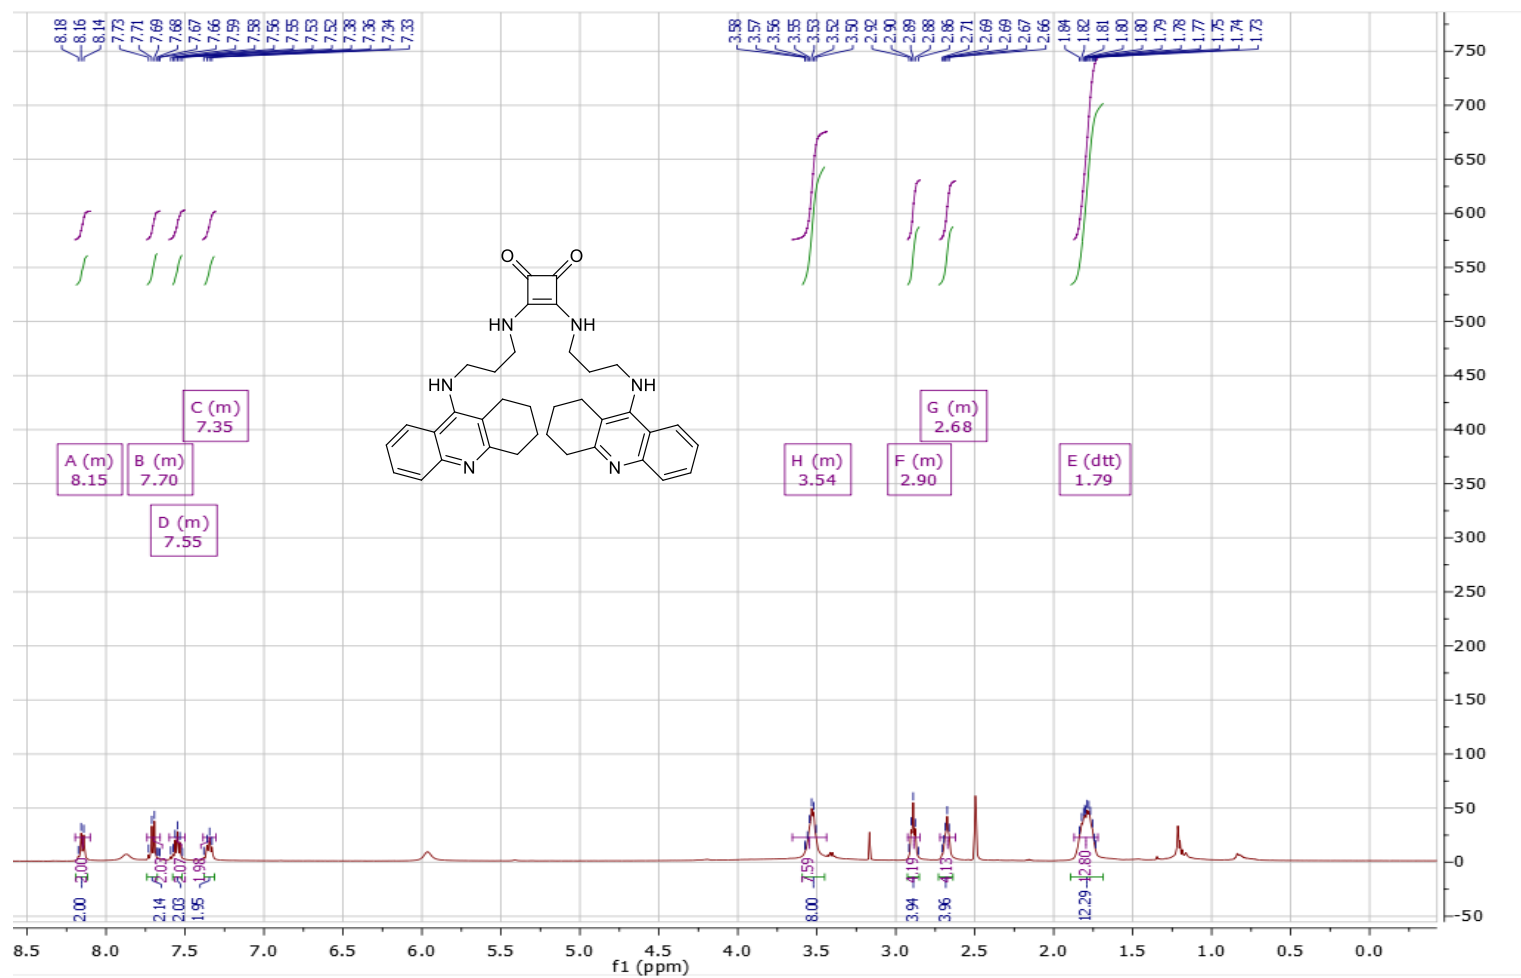

**Bis({3-[(1,2,3,4-tetrahydroacridin-9-yl)amino]propyl}amino)cyclobut-3-ene-1,2-dione (3b) <sup>13</sup>C NMR:**

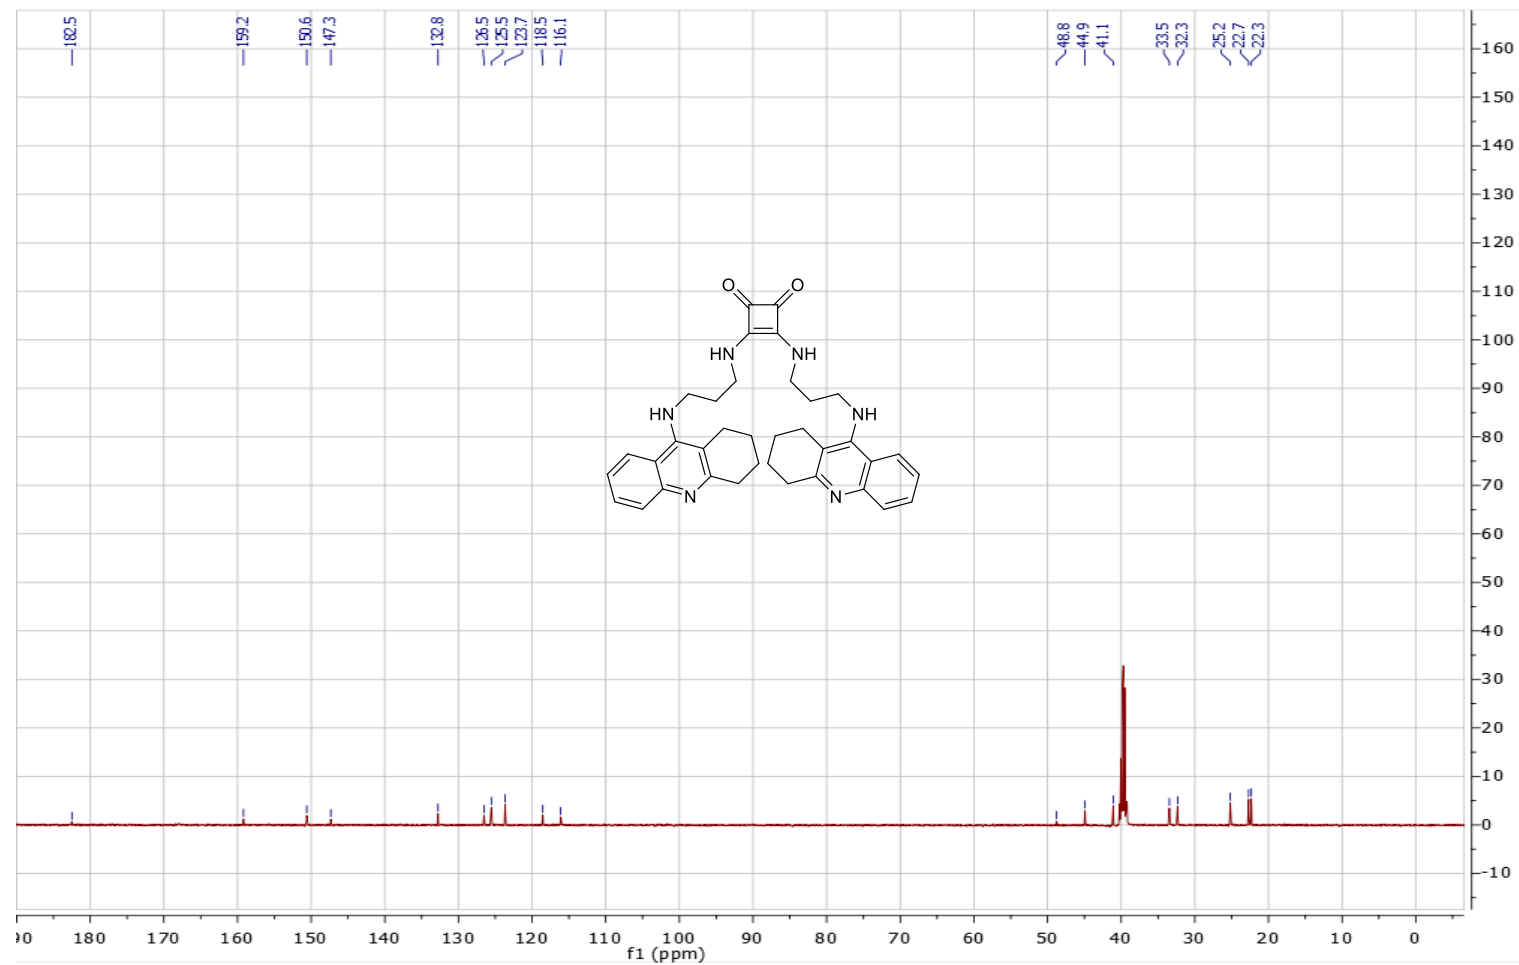

**Bis({4-[(1,2,3,4-tetrahydroacridin-9-yl)amino]butyl}amino)cyclobut-3-ene-1,2-dione (3c) <sup>1</sup>H NMR:**

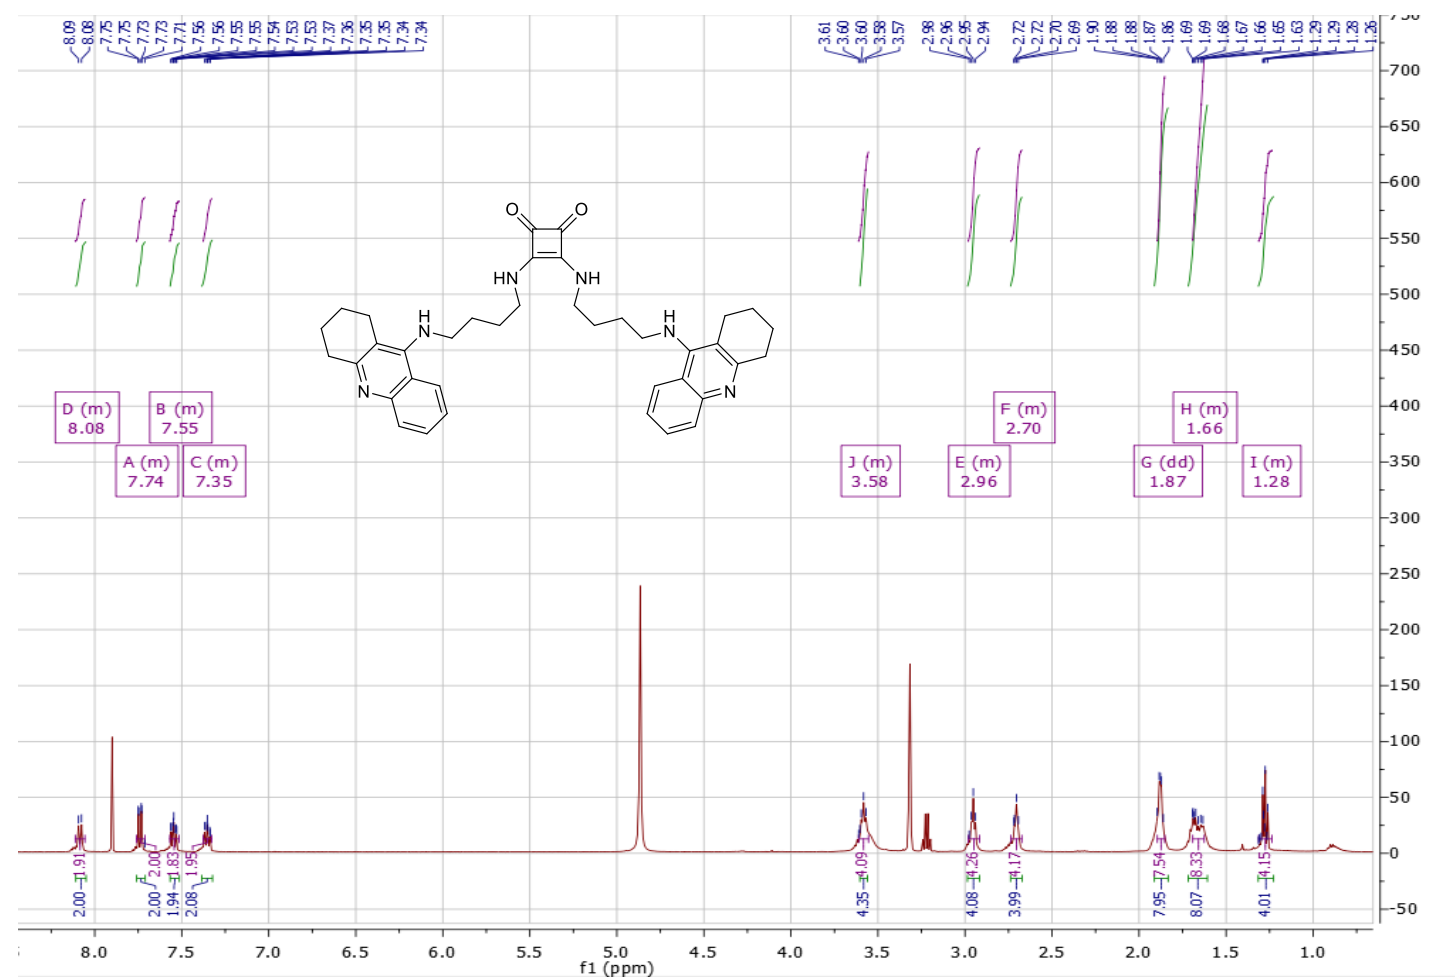

Bis({4-[(1,2,3,4-tetrahydroacridin-9-yl)amino]butyl}amino)cyclobut-3-ene-1,2-dione (3c) <sup>13</sup>C NMR:

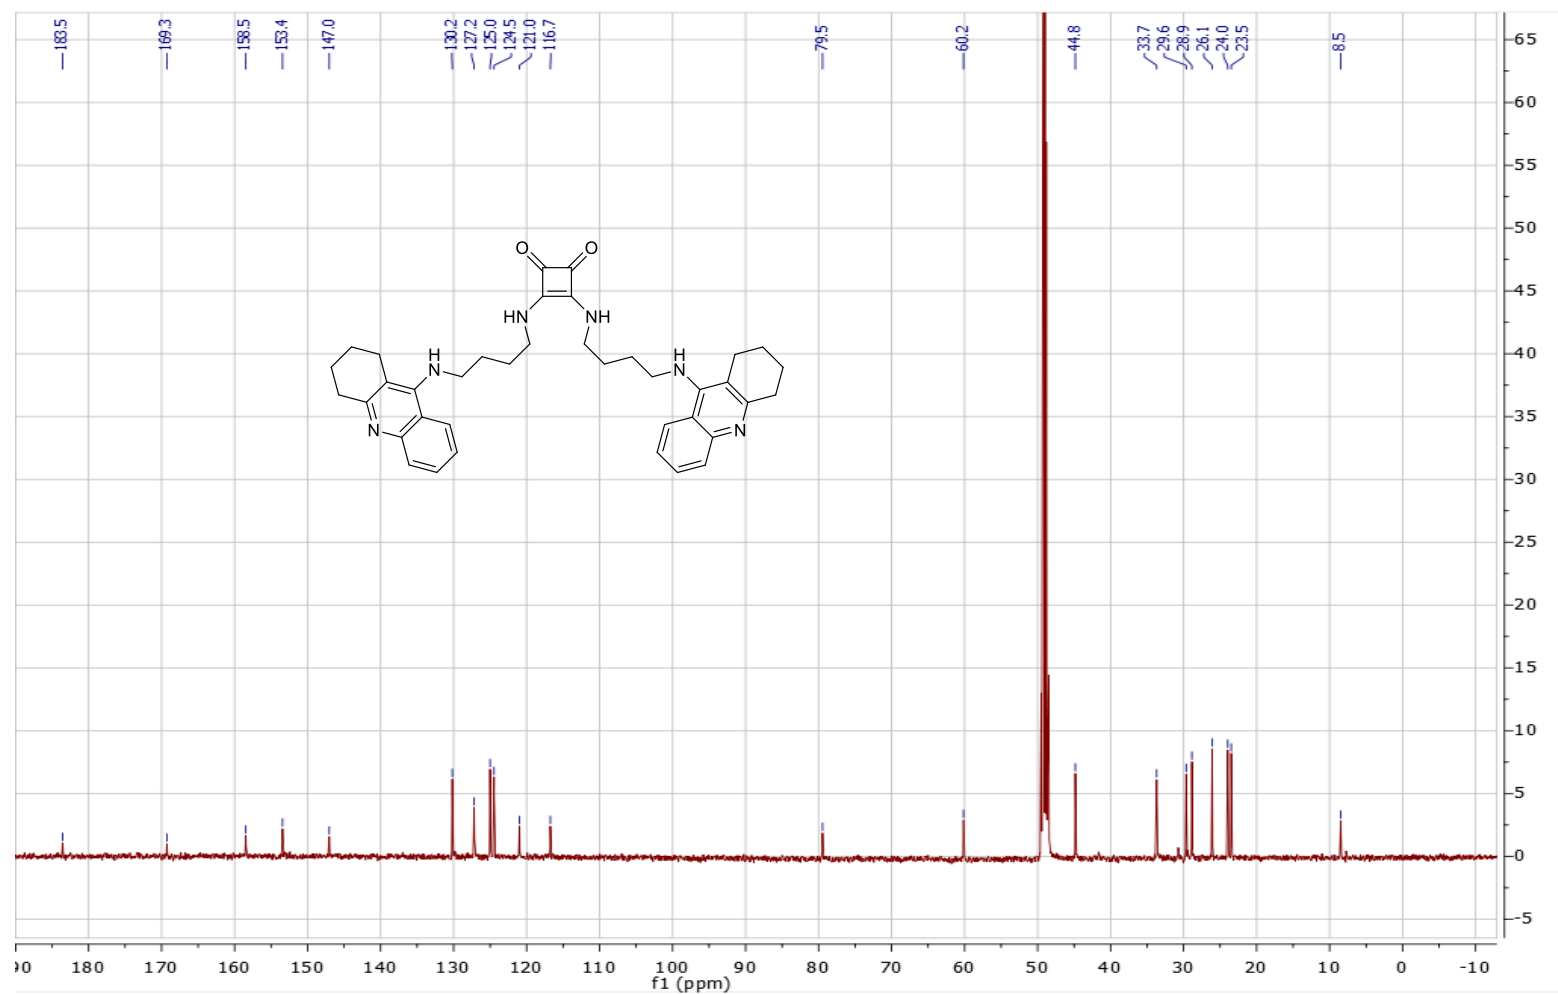

Bis({5-[(1,2,3,4-tetrahydroacridin-9-yl)amino]pentyl}amino)cyclobut-3-ene-1,2-dione (3d) <sup>1</sup>H NMR:

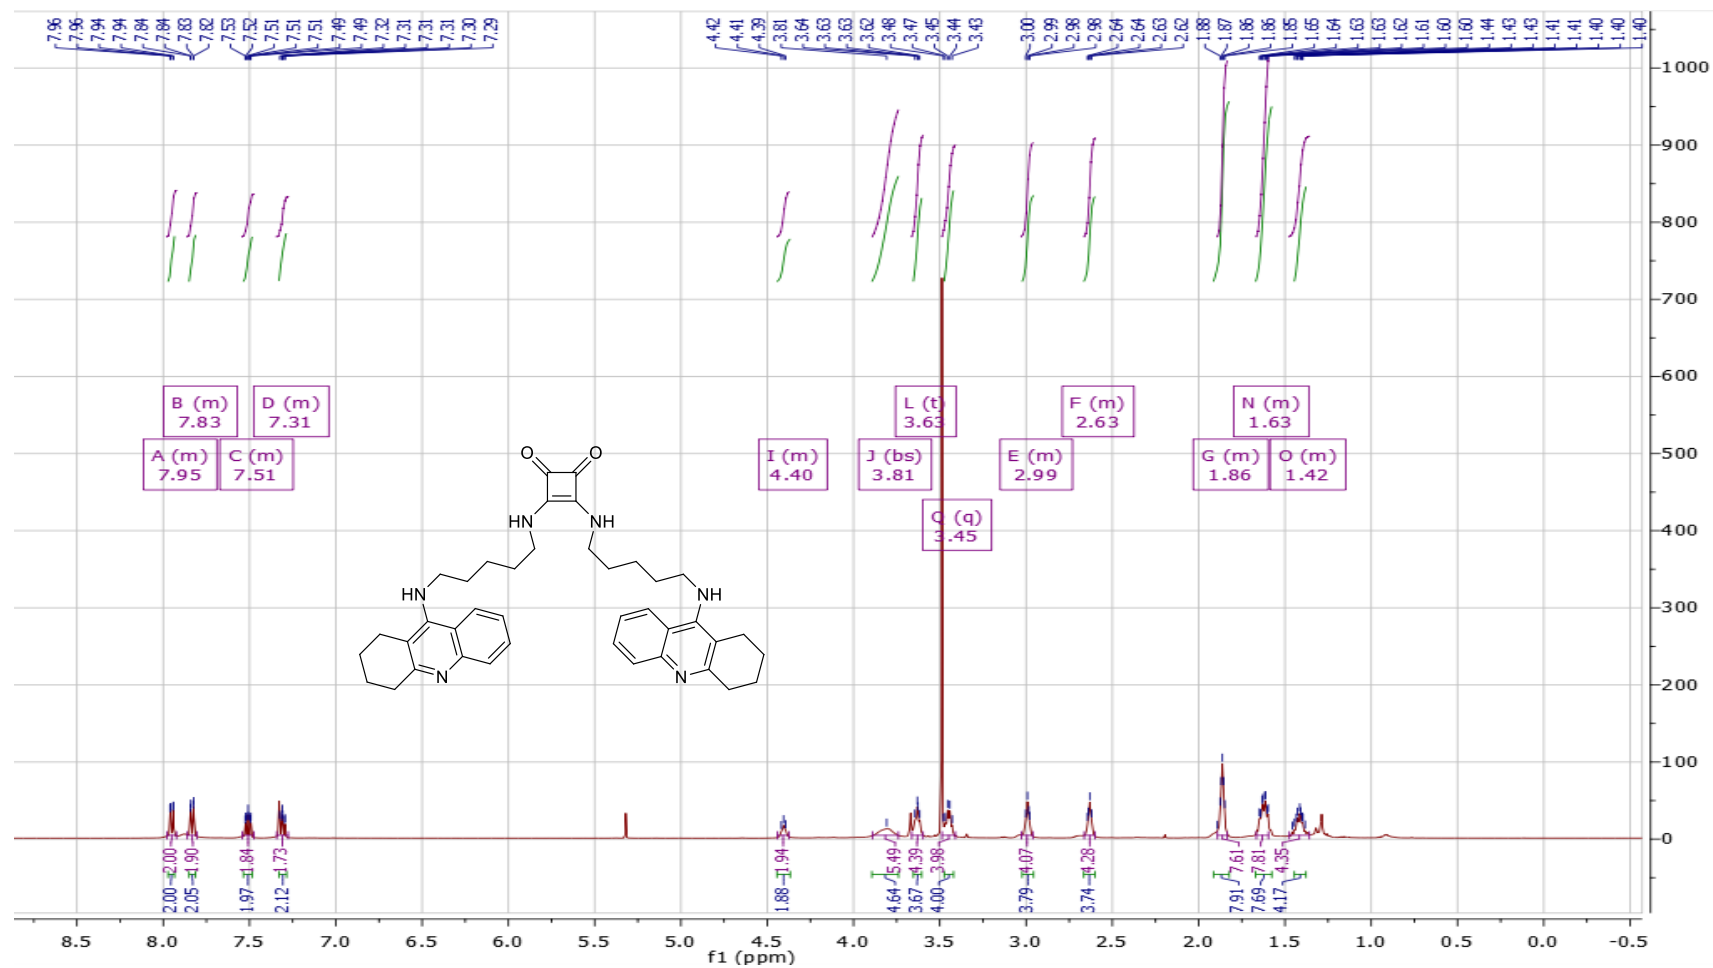



**Bis({5-[(1,2,3,4-tetrahydroacridin-9-yl)amino]pentyl}amino)cyclobut-3-ene-1,2-dione (3d) <sup>13</sup>C NMR:**

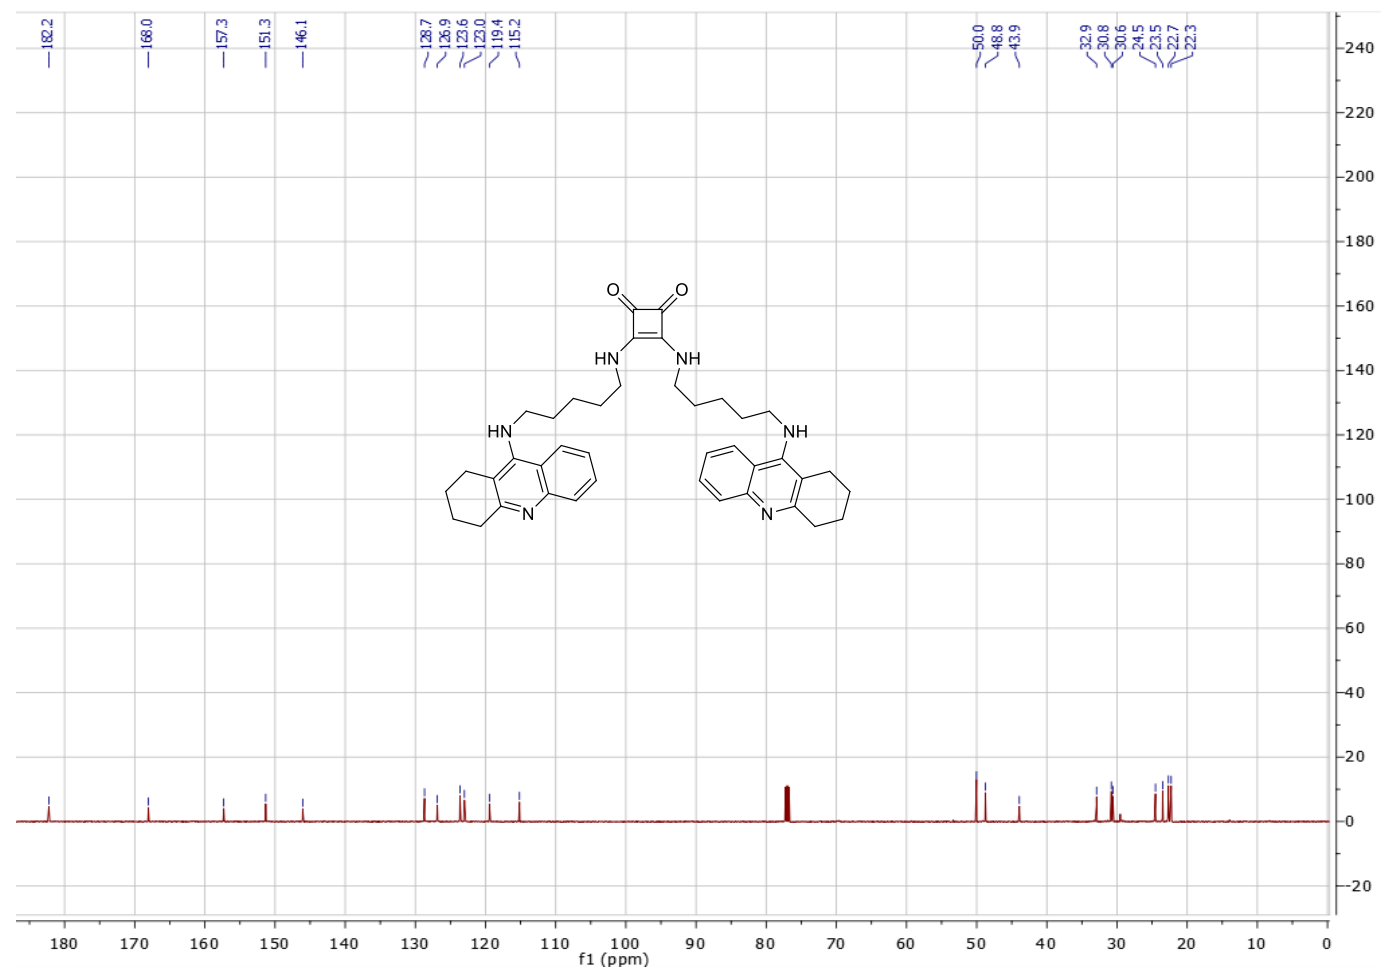

Bis({6-[(1,2,3,4-tetrahydroacridin-9-yl)amino]hexyl}amino)cyclobut-3-ene-1,2-dione (3e) <sup>1</sup>H NMR:

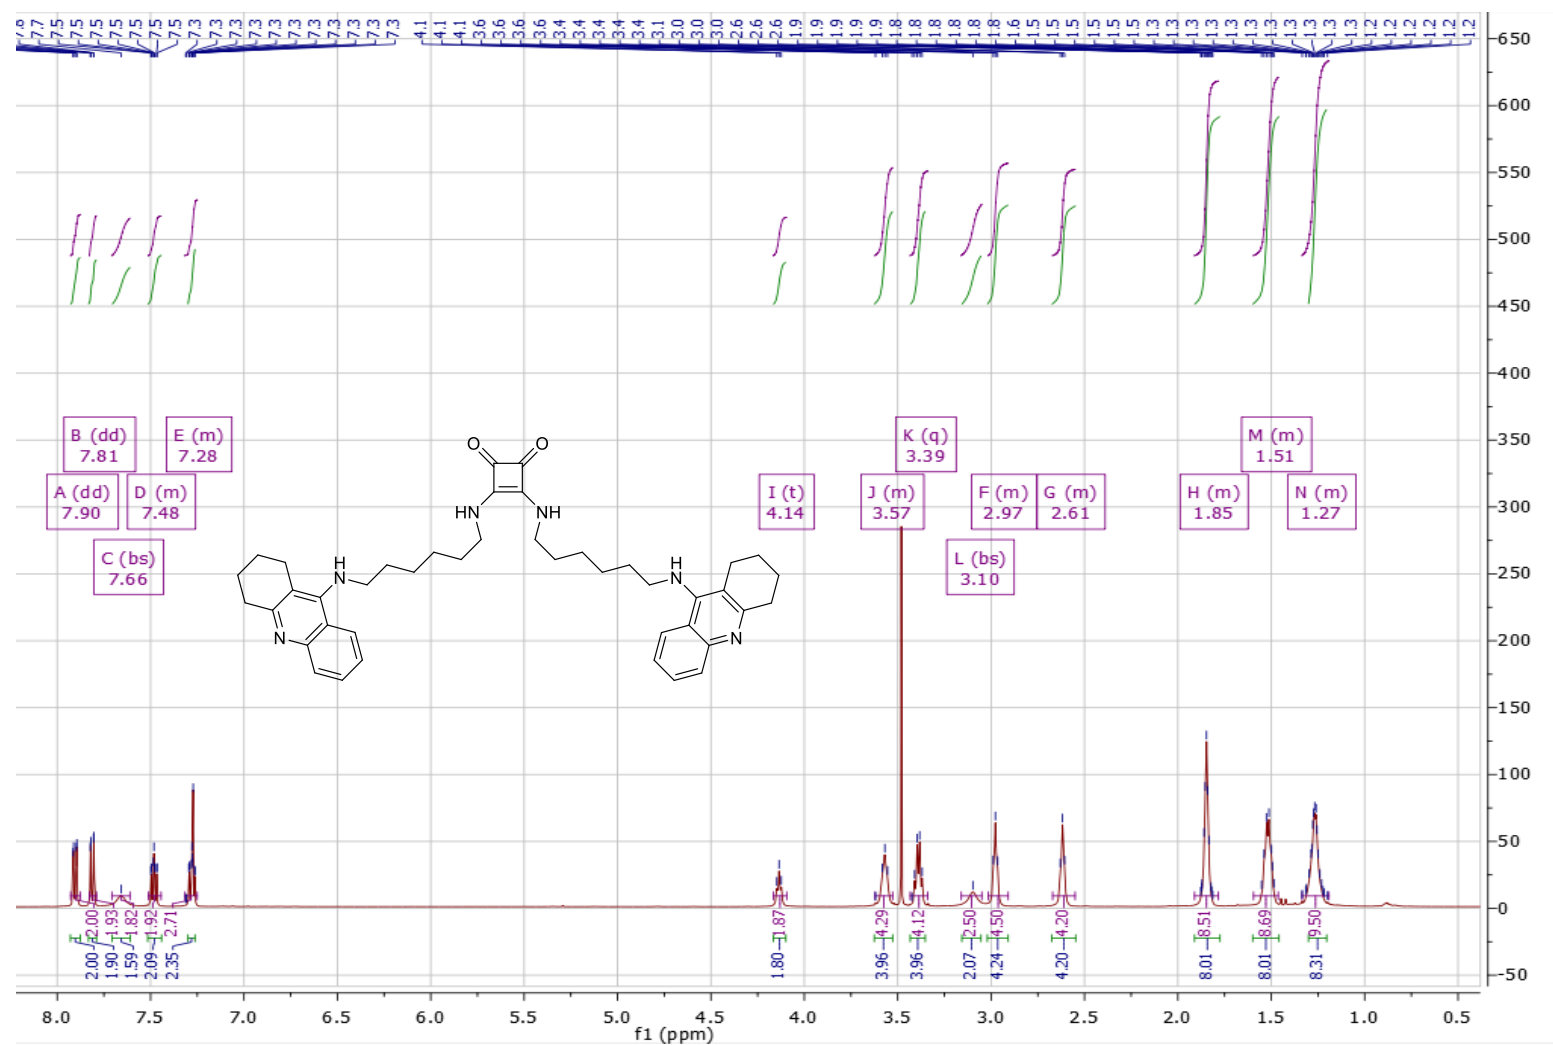

**Bis({6-[(1,2,3,4-tetrahydroacridin-9-yl)amino]hexyl}amino)cyclobut-3-ene-1,2-dione (3e) <sup>13</sup>C NMR:**

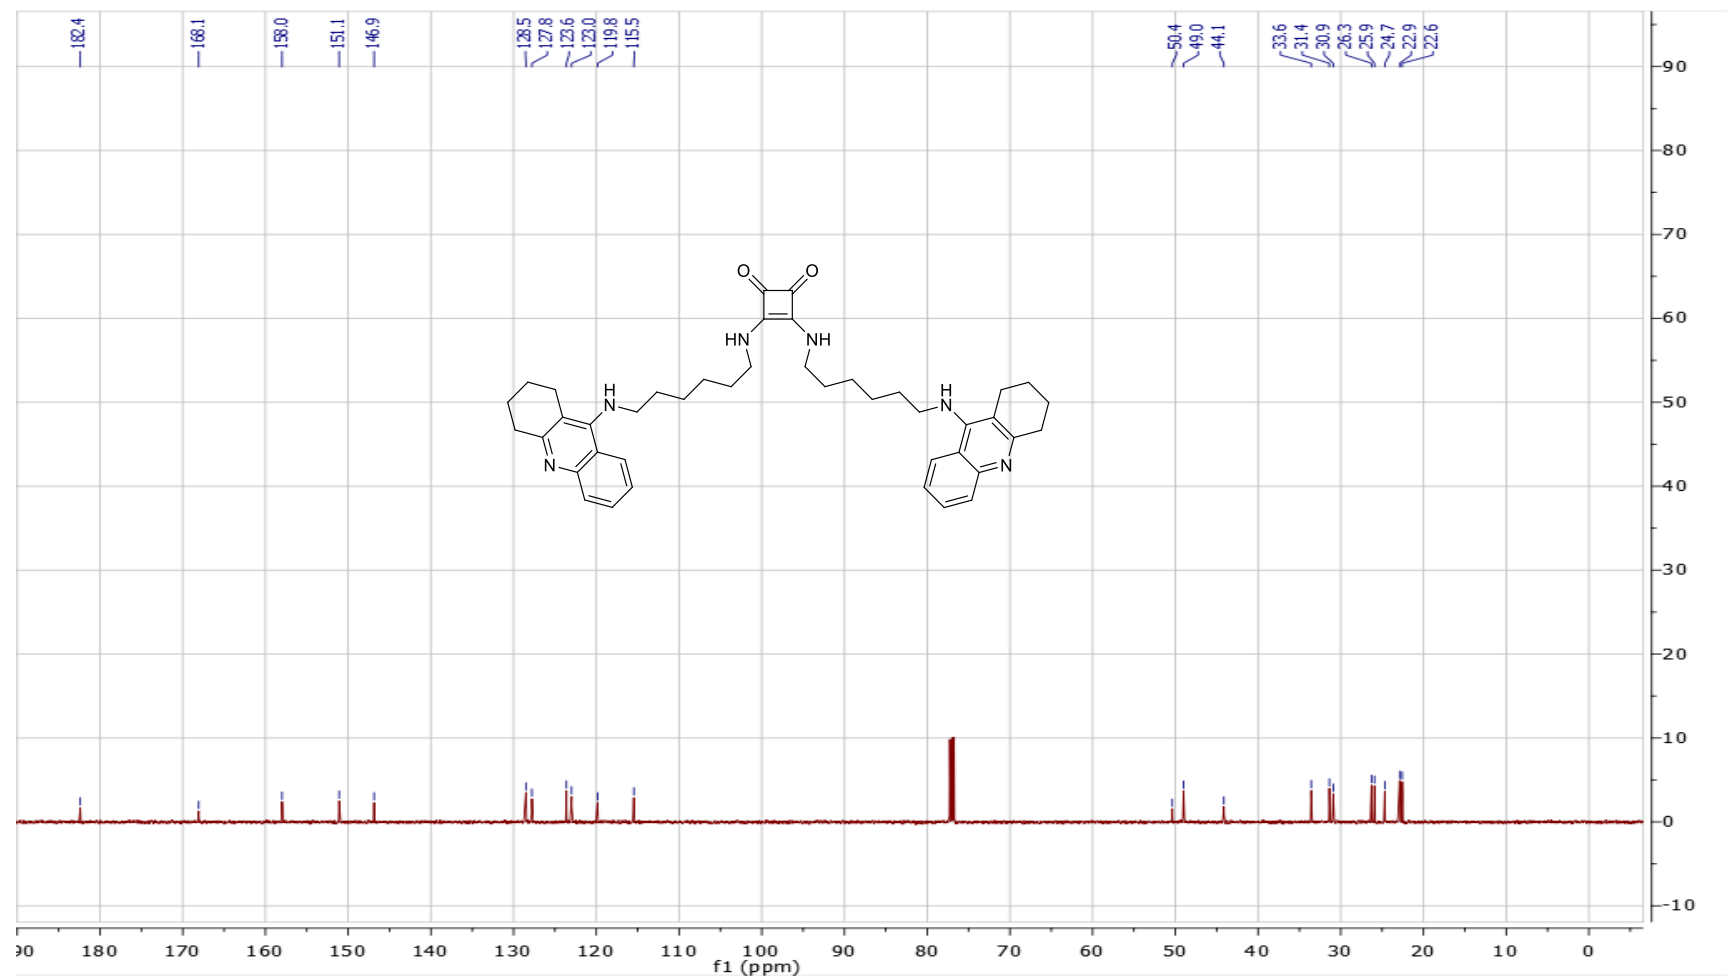

Bis({7-[(1,2,3,4-tetrahydroacridin-9-yl)amino]heptyl}amino)cyclobut-3-ene-1,2-dione (3f) <sup>1</sup>H NMR:

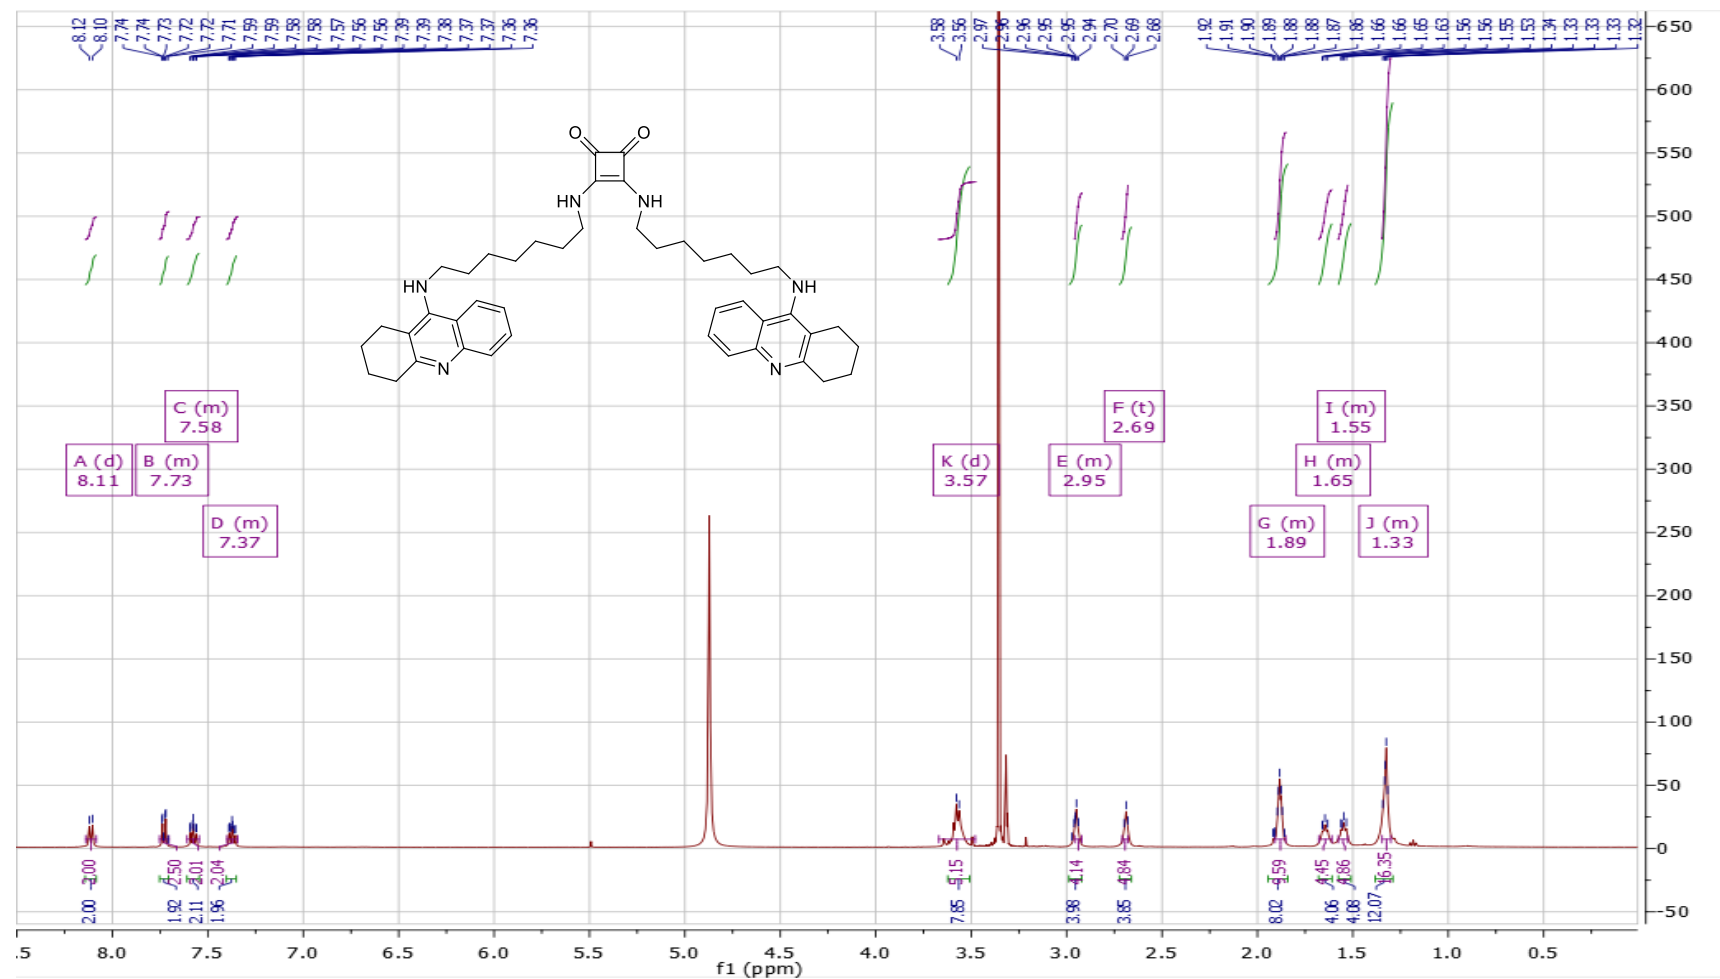

Bis({7-[(1,2,3,4-tetrahydroacridin-9-yl)amino]heptyl}amino)cyclobut-3-ene-1,2-dione (3f) <sup>13</sup>C NMR:

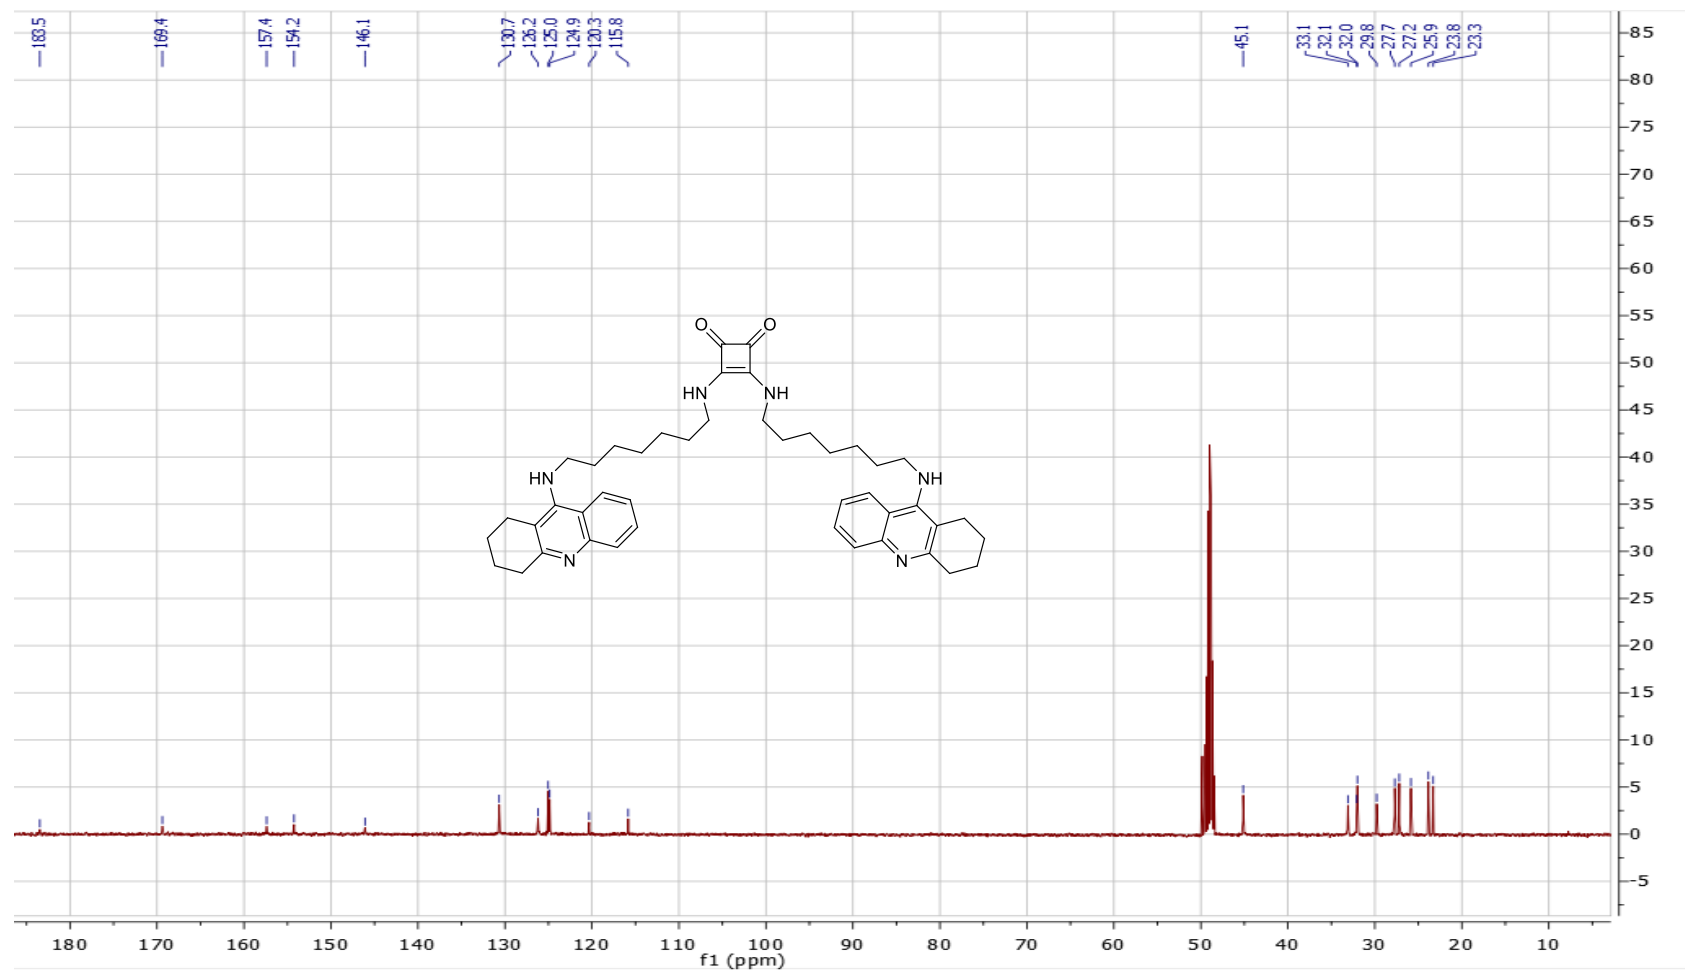

Bis({8-[(1,2,3,4-tetrahydroacridin-9-yl)amino]octyl}amino)cyclobut-3-ene-1,2-dione (3g) <sup>1</sup>H NMR:

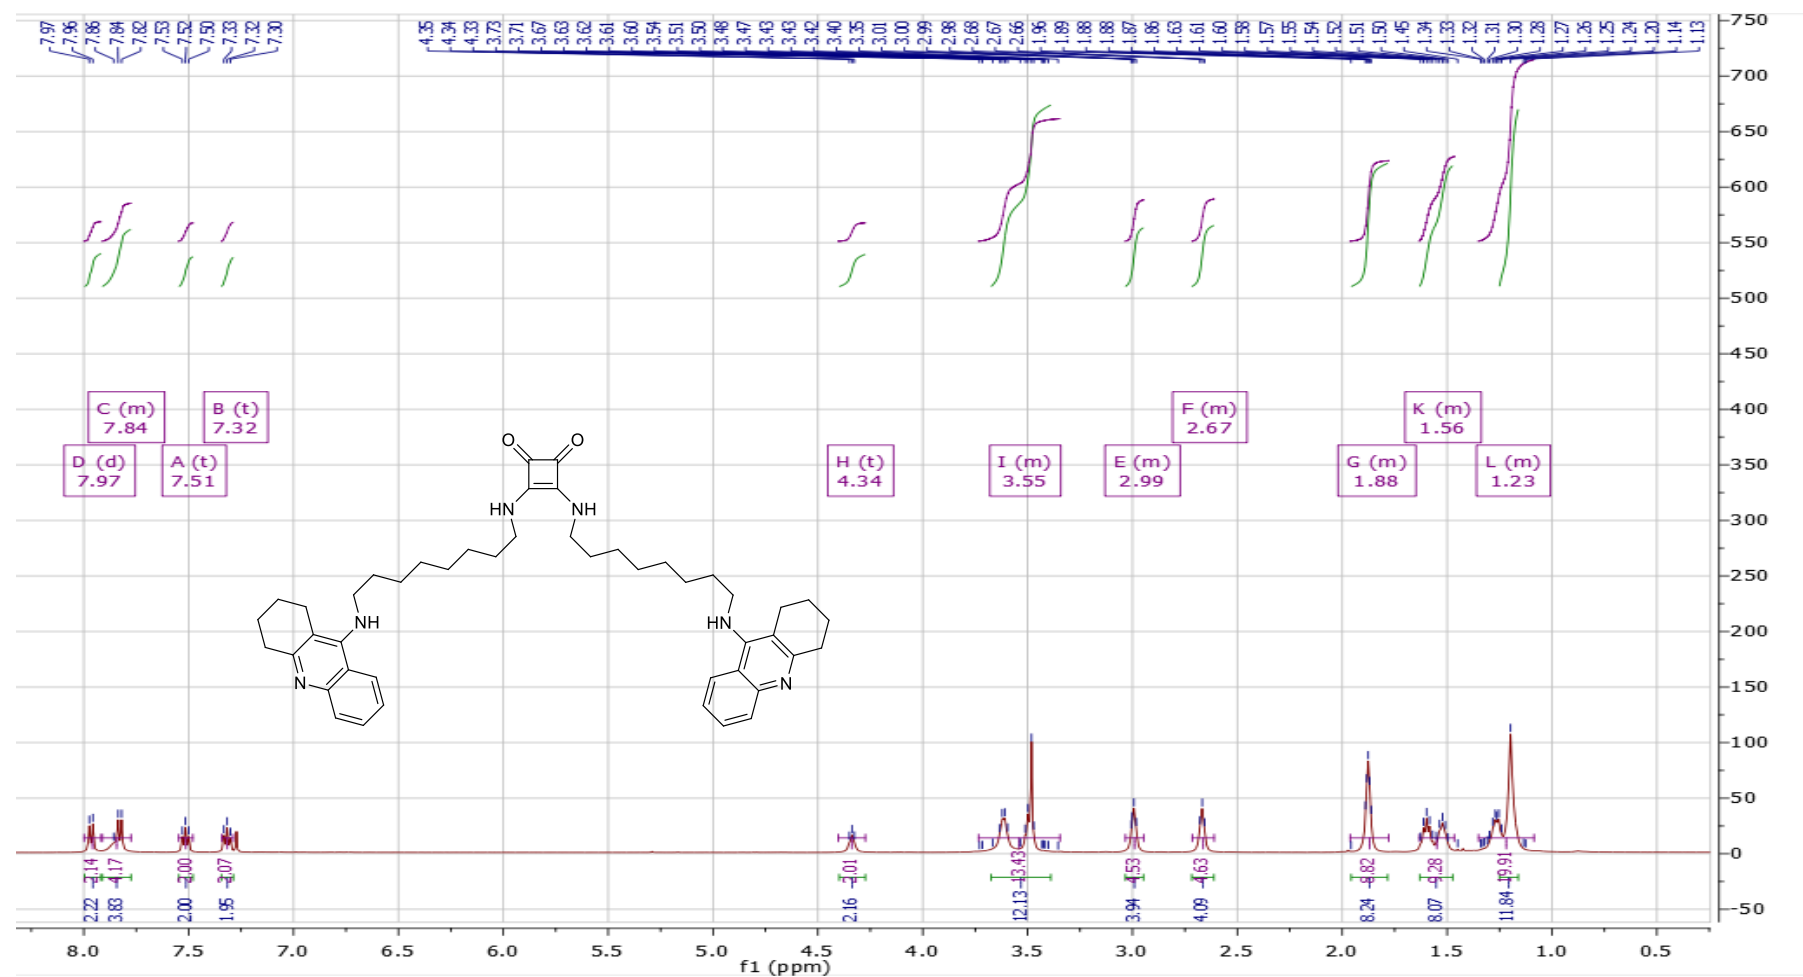

**Bis({8-[(1,2,3,4-tetrahydroacridin-9-yl)amino]octyl}amino)cyclobut-3-ene-1,2-dione (3g) <sup>13</sup>C NMR:**

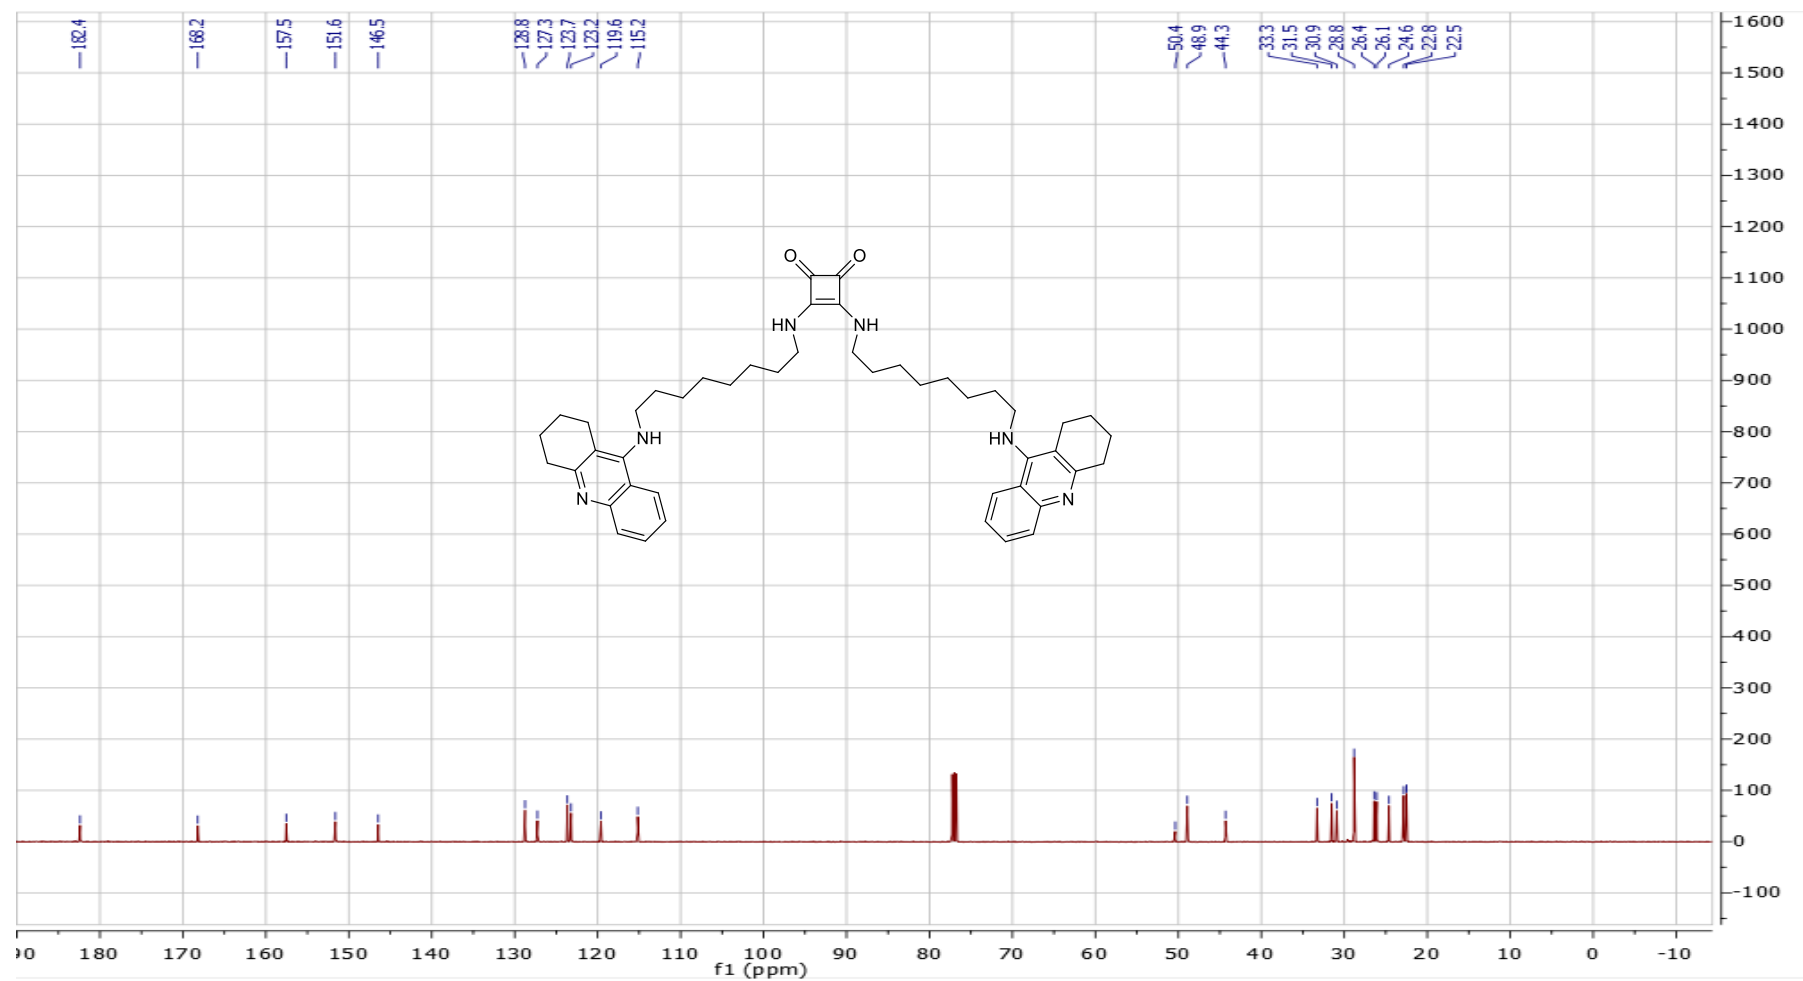

**Bis(2-[(1,2,3,4-tetrahydroacridin-9-yl)amino]ethyl)amino)cyclobut-3-ene-1,2-dione (4a) <sup>1</sup>H NMR:**

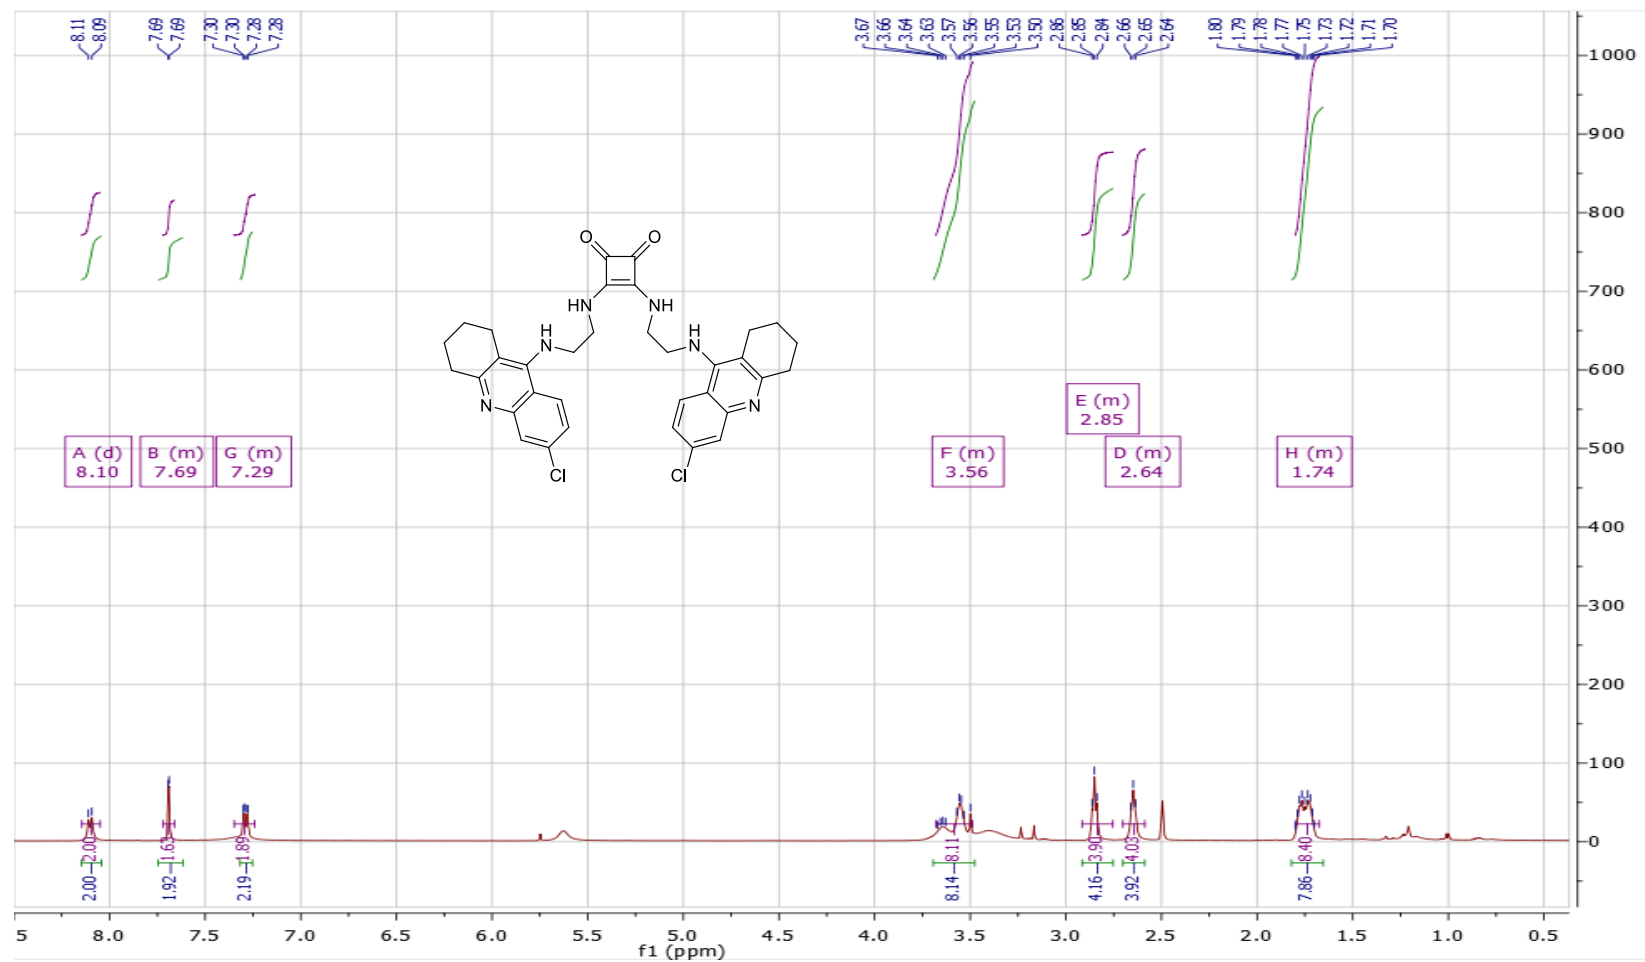



**Bis(2-[(1,2,3,4-tetrahydroacridin-9-yl)amino]ethyl)amino)cyclobut-3-ene-1,2-dione (4a) <sup>13</sup>C NMR:**

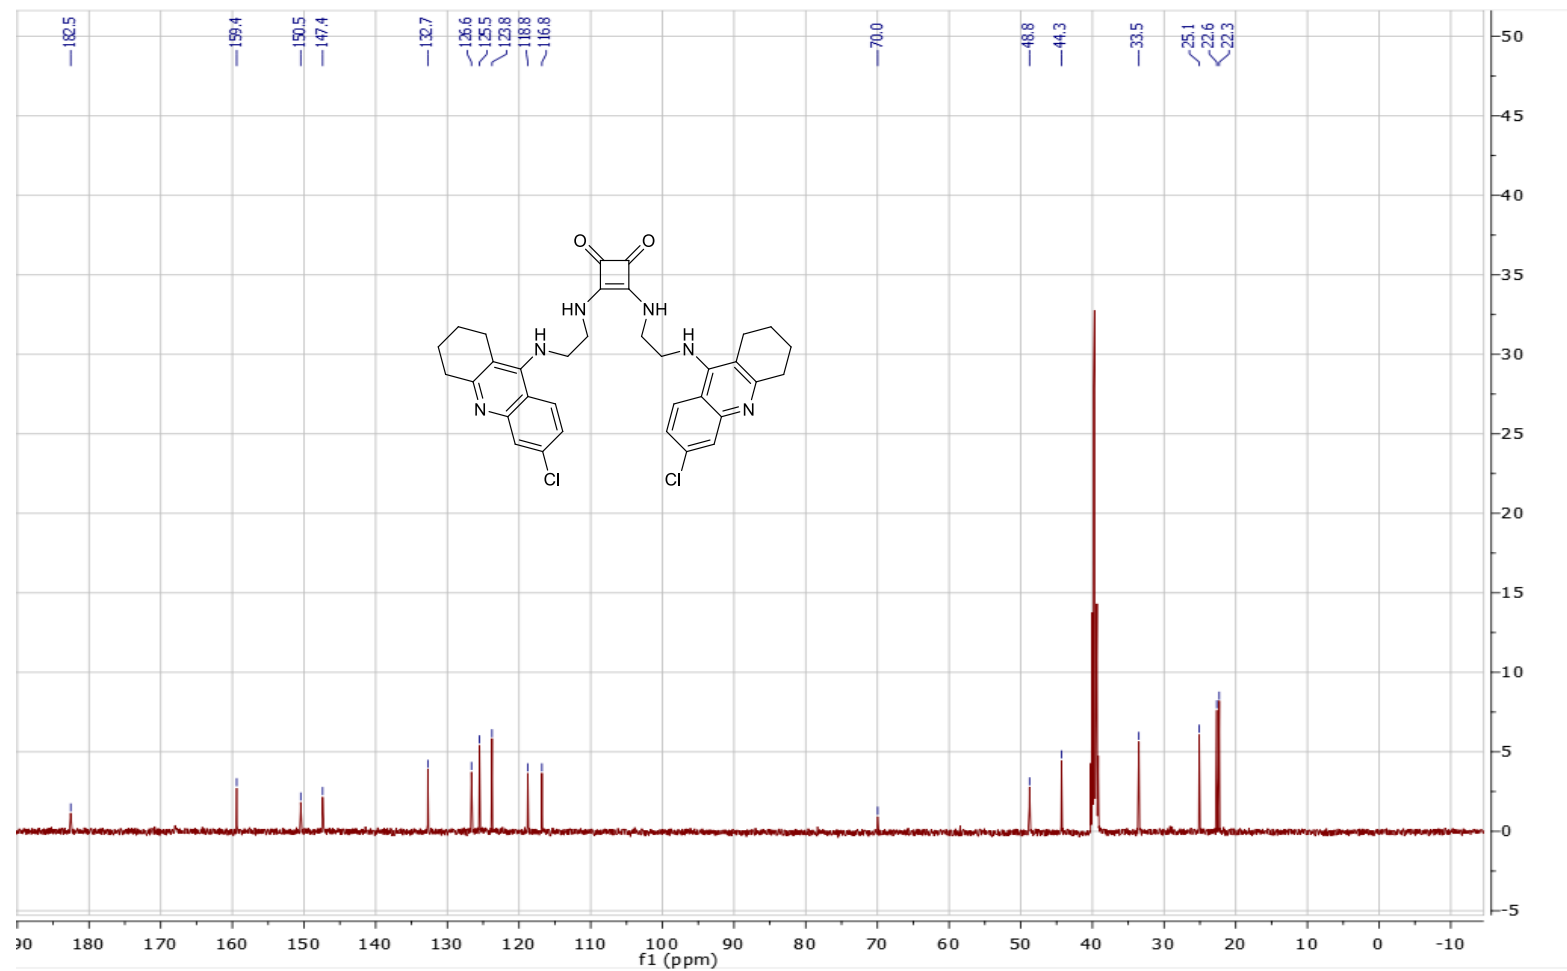

Bis({3-[(6-chloro-1,2,3,4-tetrahydroacridin-9-yl)amino]propyl}amino)cyclobut-3-ene-1,2-dione (4b) <sup>1</sup>H NMR:

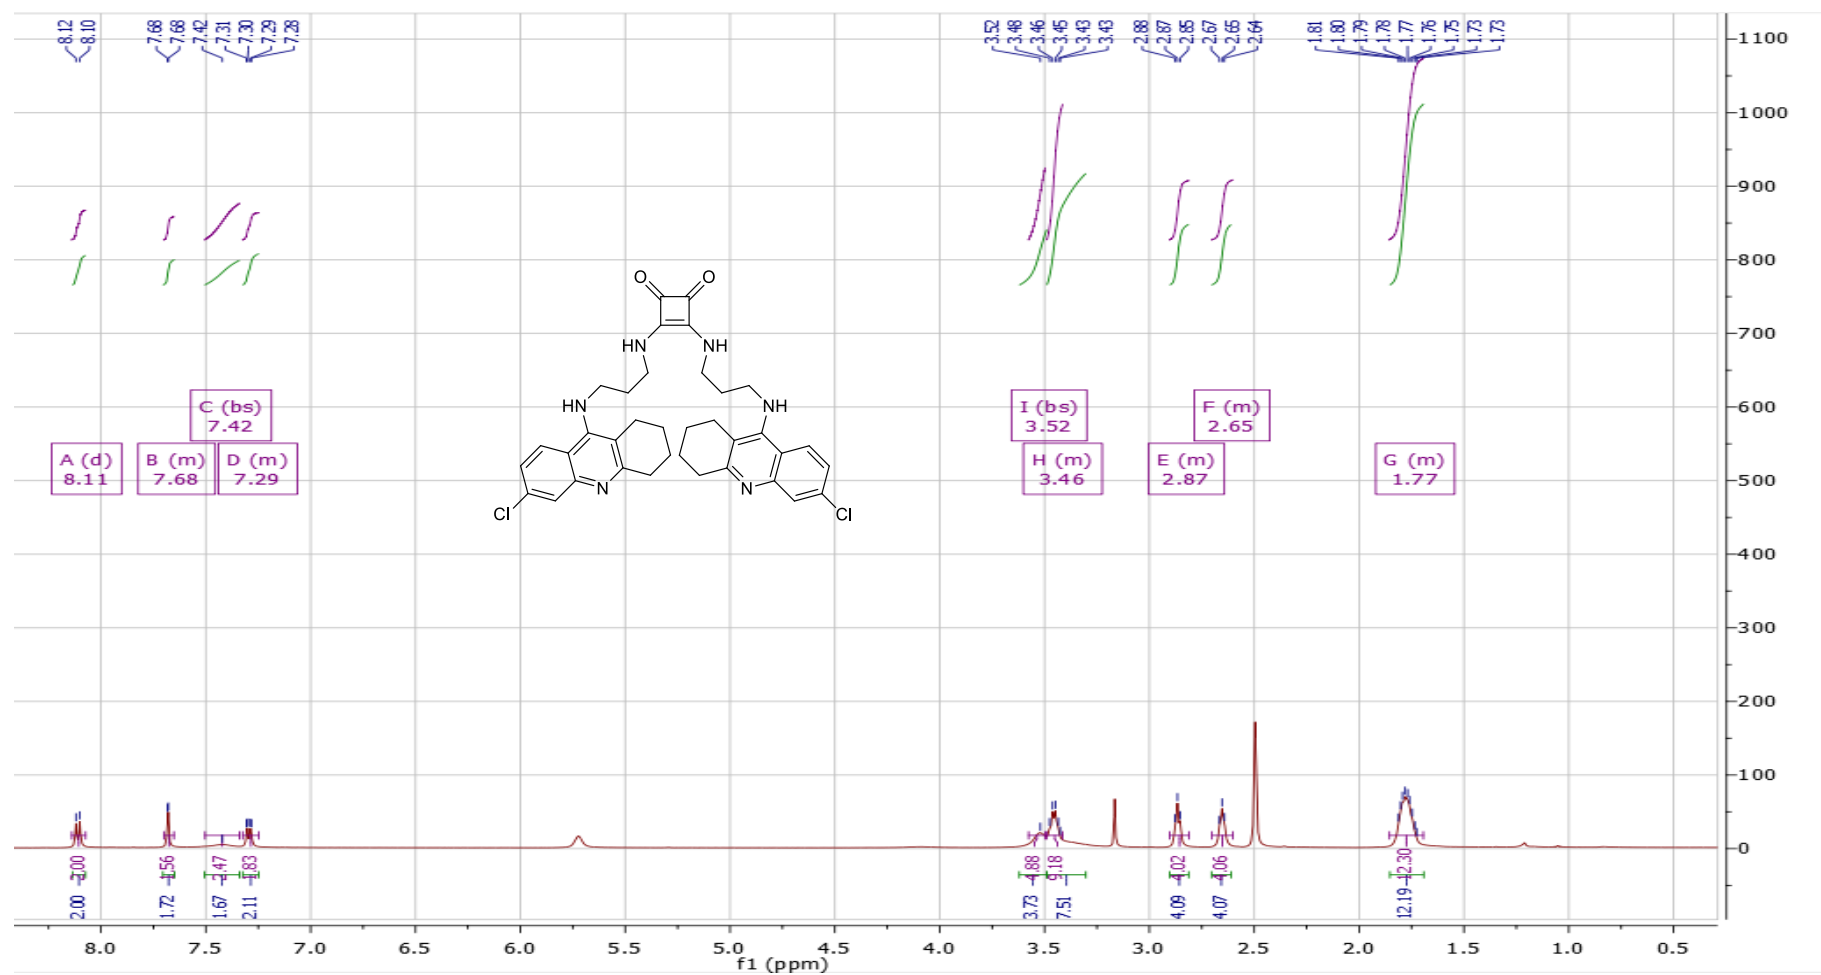

Bis({3-[(6-chloro-1,2,3,4-tetrahydroacridin-9-yl)amino]propyl}amino)cyclobut-3-ene-1,2-dione (4b) <sup>13</sup>C NMR:

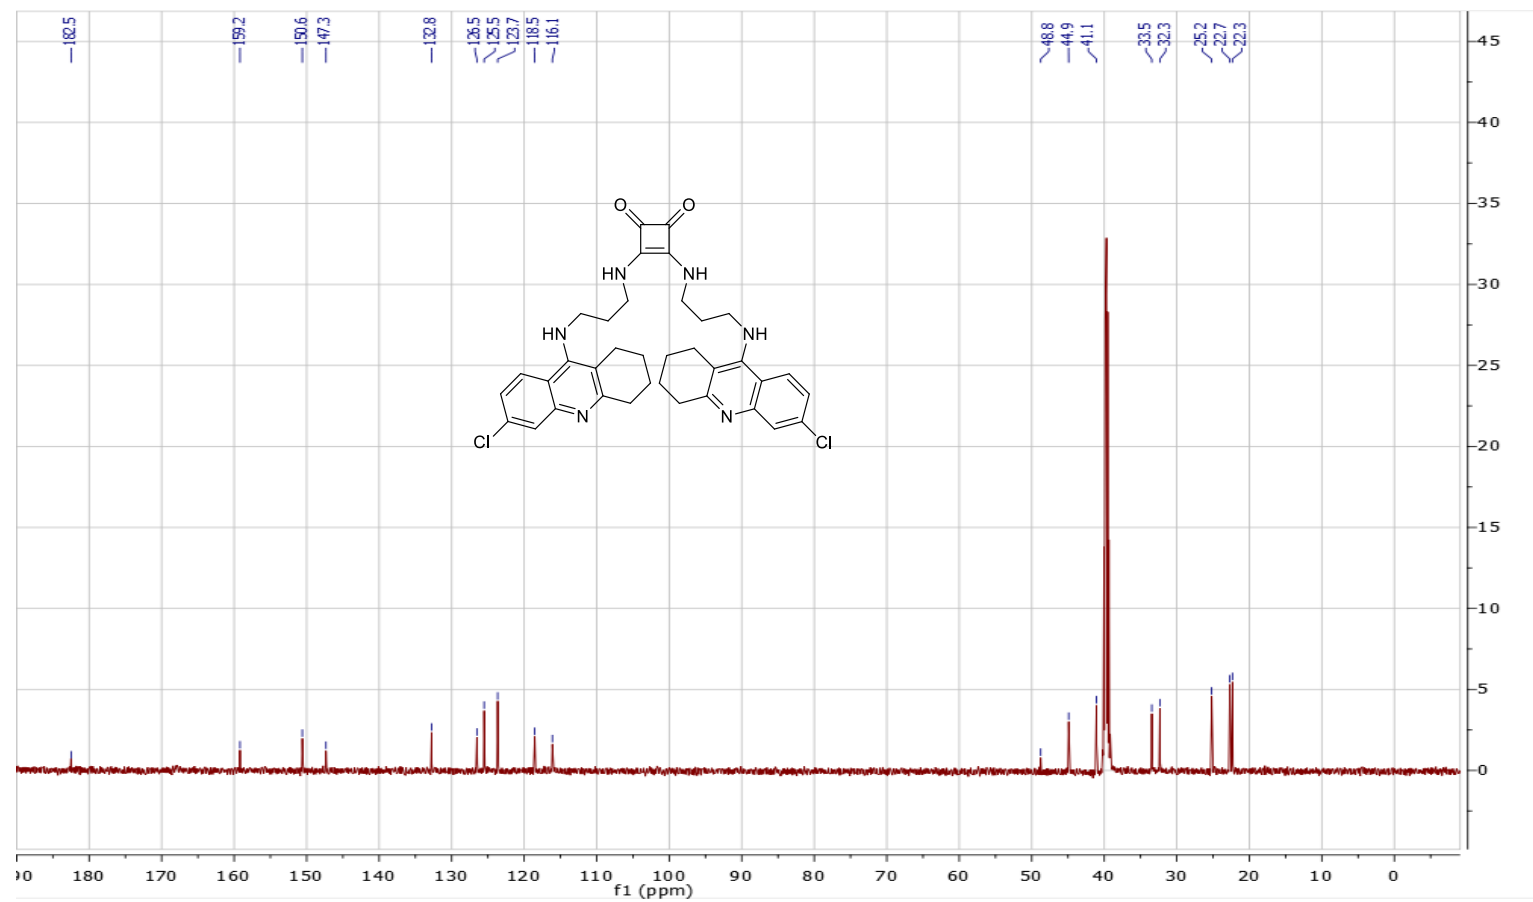

Bis(4-[(6-chloro-1,2,3,4-tetrahydroacridin-9-yl)amino]butyl)amino)cyclobut-3-ene-1,2-dione (4c) <sup>1</sup>H NMR:

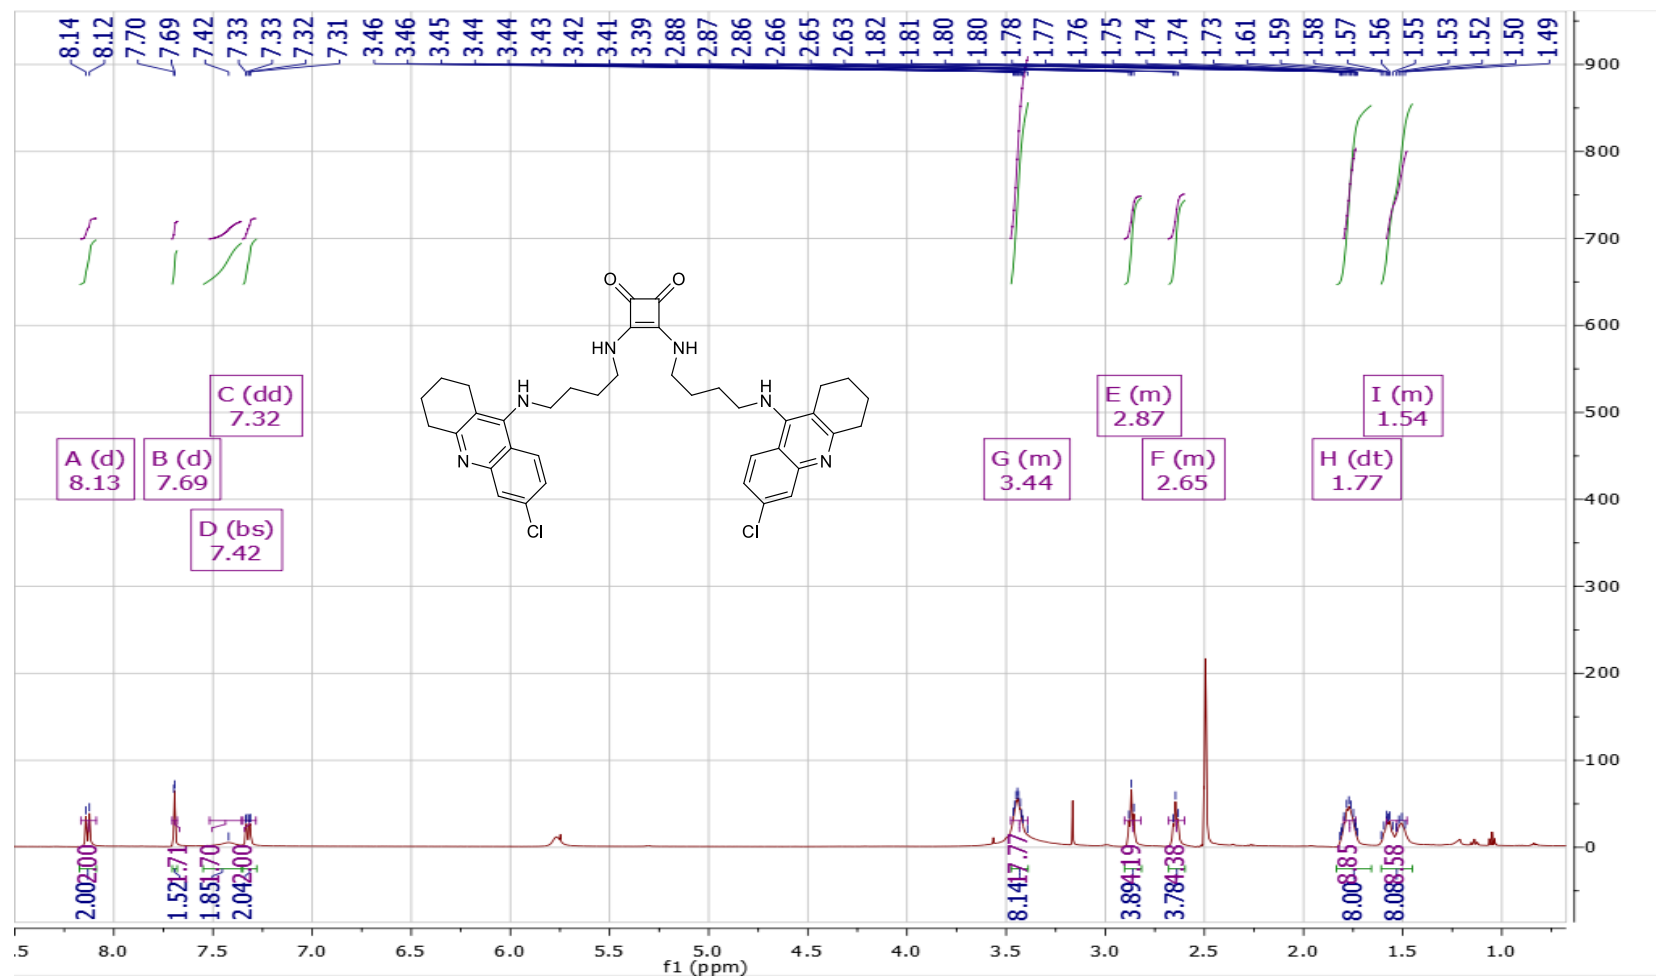

Bis({4-[(6-chloro-1,2,3,4-tetrahydroacridin-9-yl)amino]butyl}amino)cyclobut-3-ene-1,2-dione (4c)  $^{13}\text{C}$  NMR:

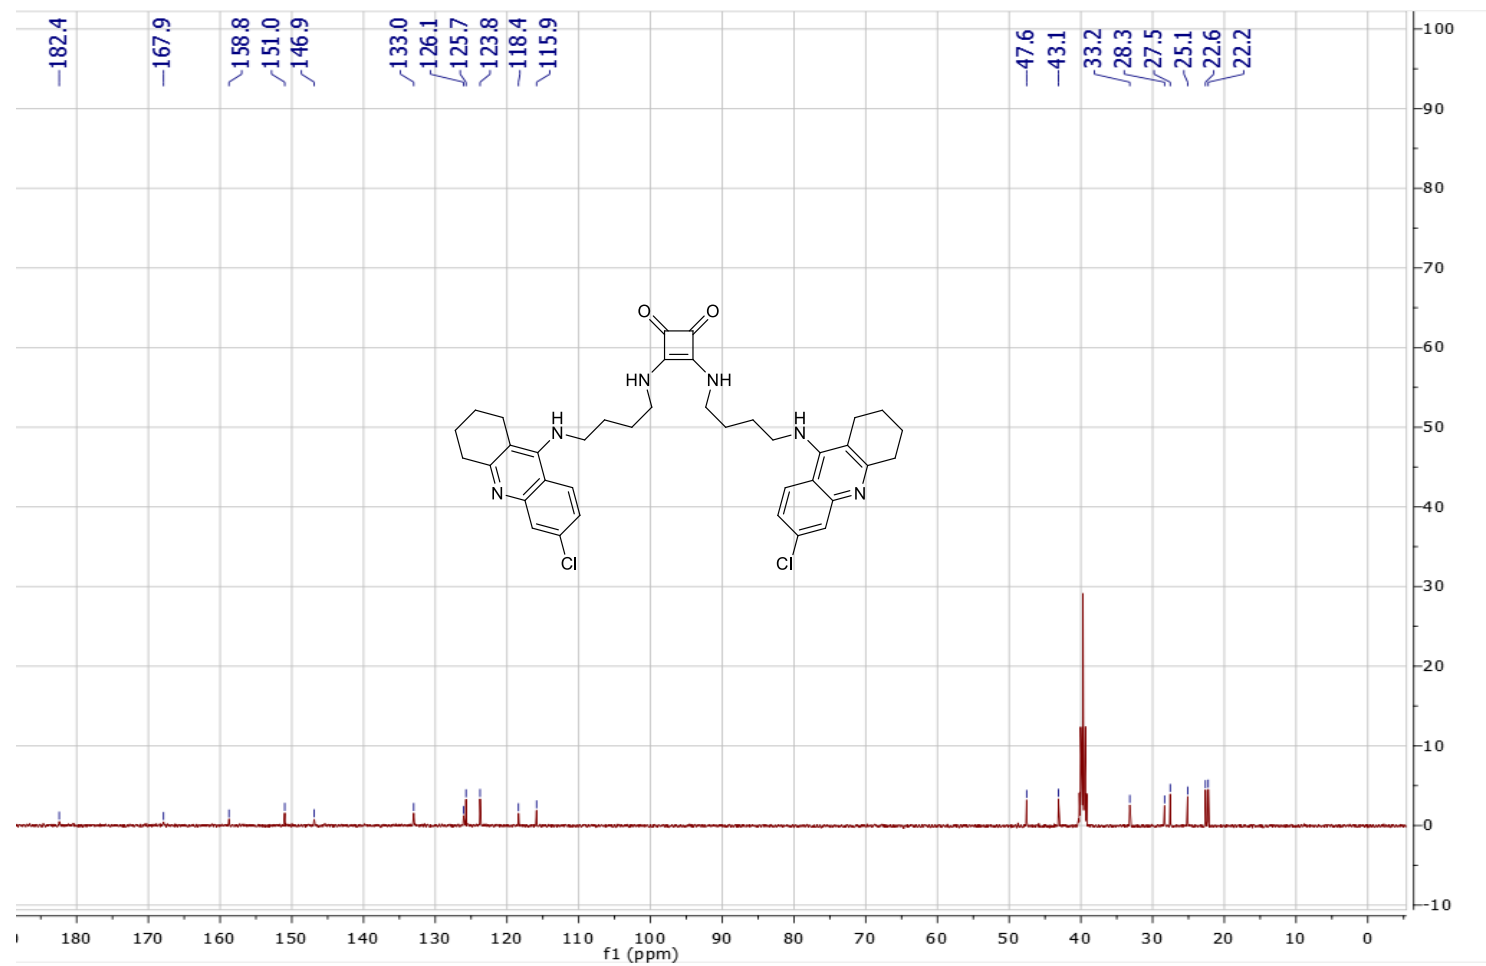

Bis({5-[(6-chloro-1,2,3,4-tetrahydroacridin-9-yl)amino]pentyl}amino)cyclobut-3-ene-1,2-dione (4d) <sup>1</sup>H NMR:

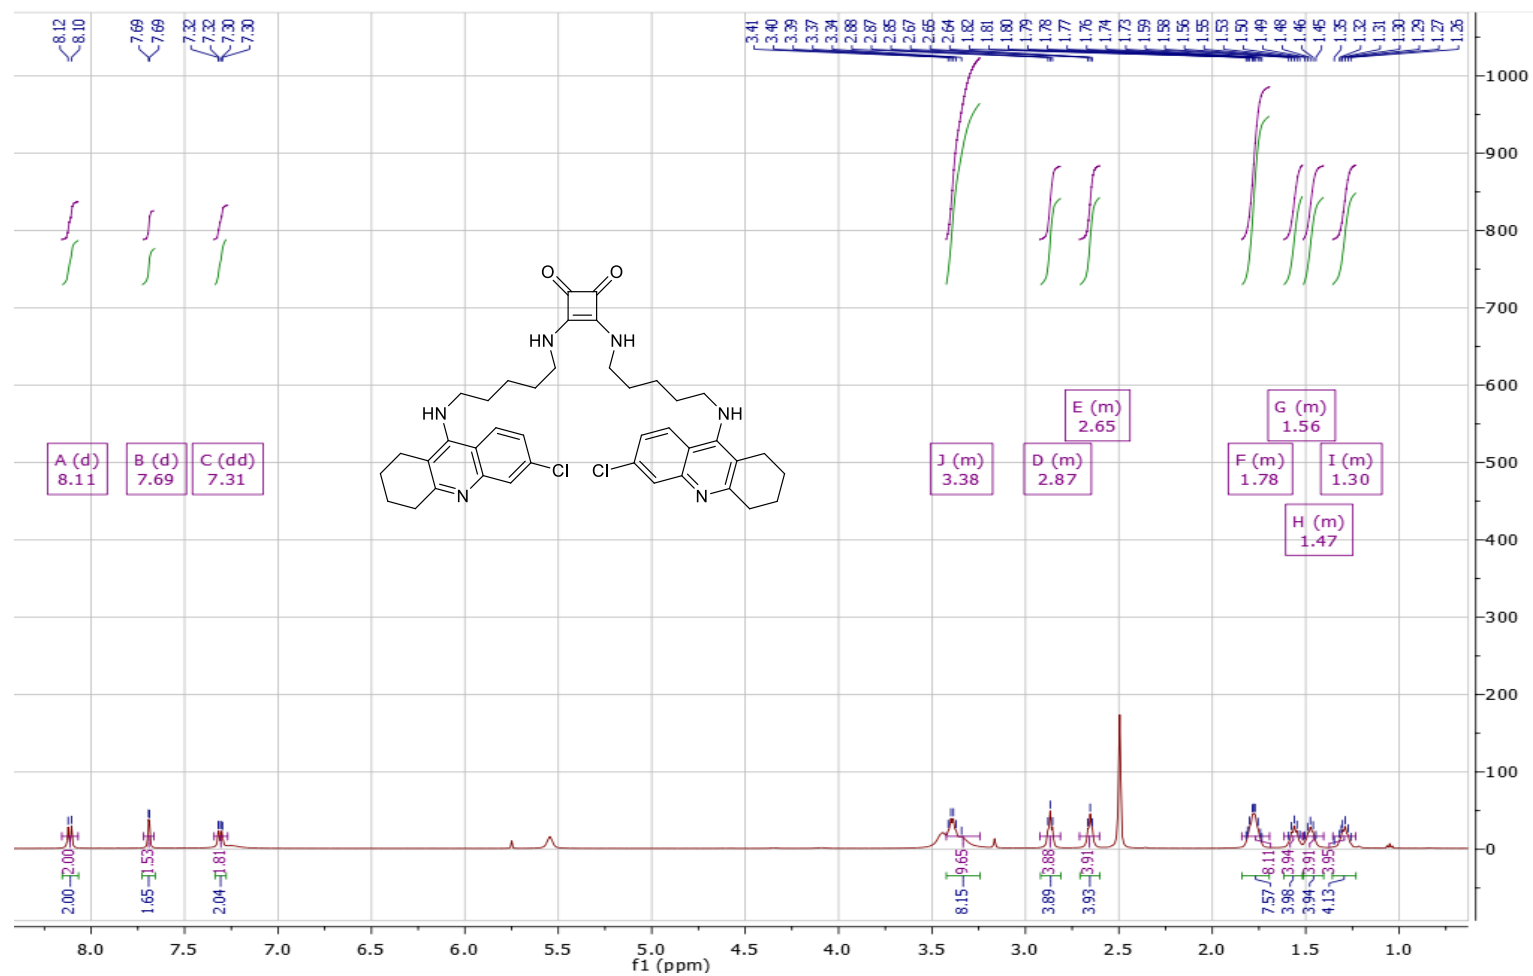

Bis({5-[(6-chloro-1,2,3,4-tetrahydroacridin-9-yl)amino]pentyl}amino)cyclobut-3-ene-1,2-dione (4d) <sup>13</sup>C NMR:

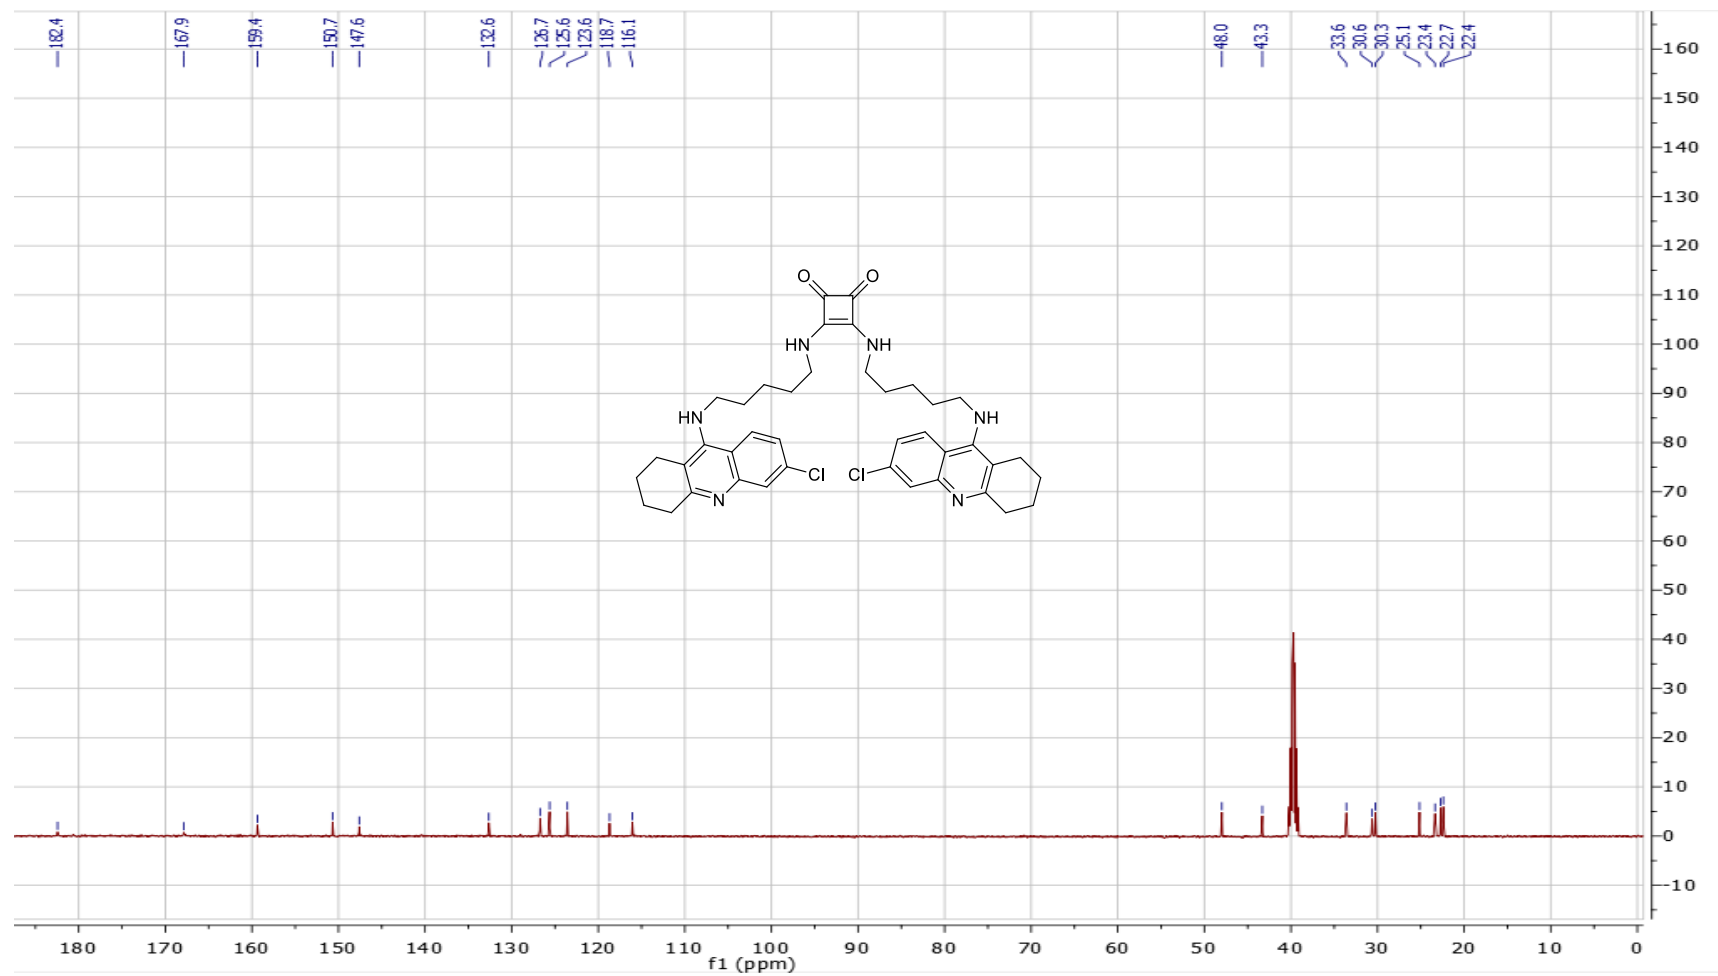

Bis({6-[(6-chloro-1,2,3,4-tetrahydroacridin-9-yl)amino]hexyl}amino)cyclobut-3-ene-1,2-dione (4e) <sup>1</sup>H NMR:

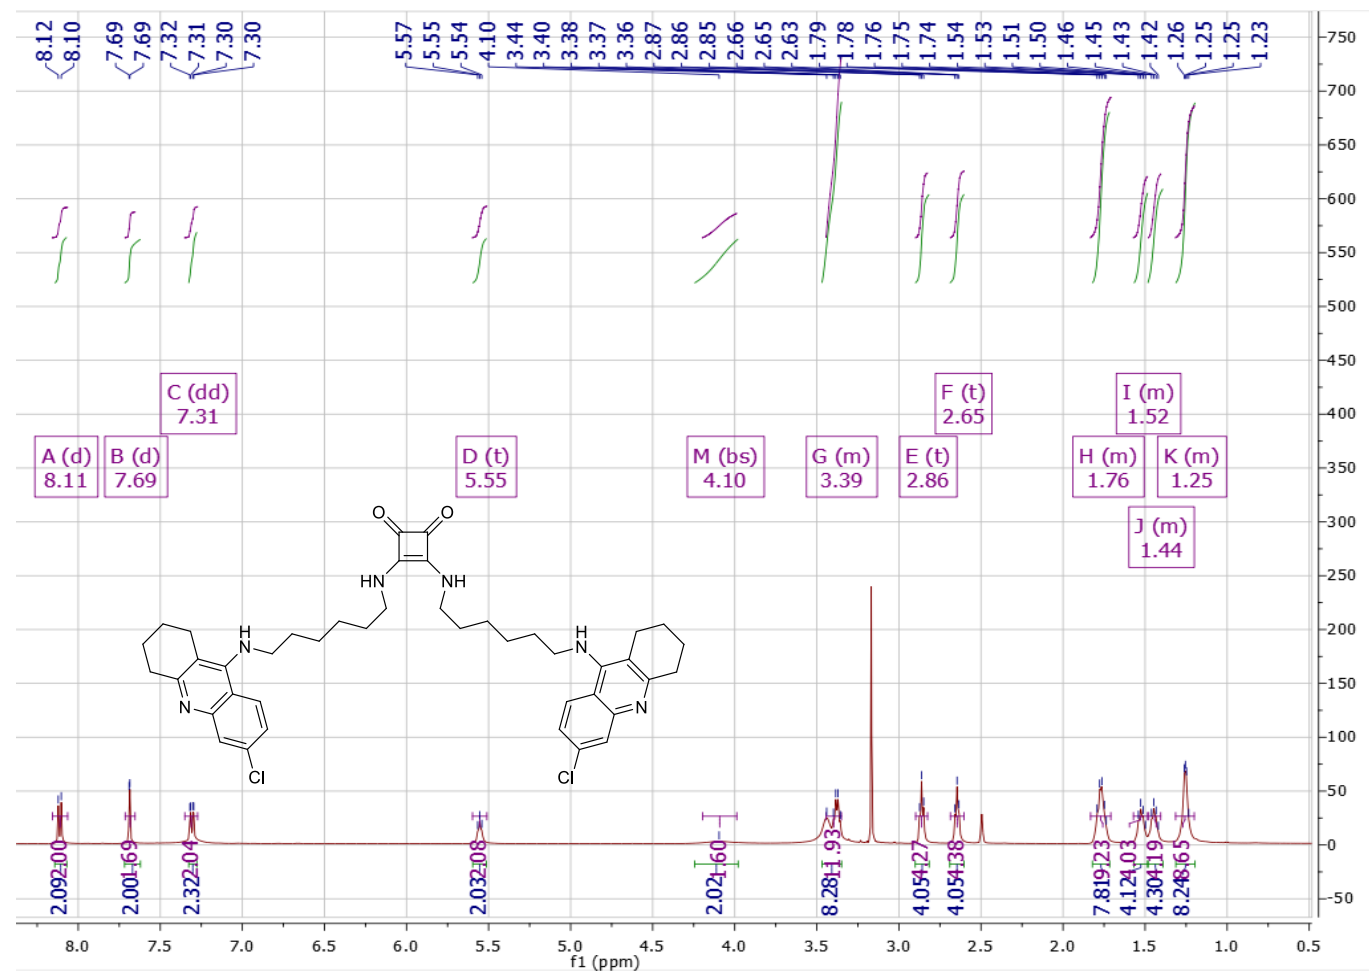



Bis({6-[(6-chloro-1,2,3,4-tetrahydroacridin-9-yl)amino]hexyl}amino)cyclobut-3-ene-1,2-dione (4e) <sup>13</sup>C NMR:

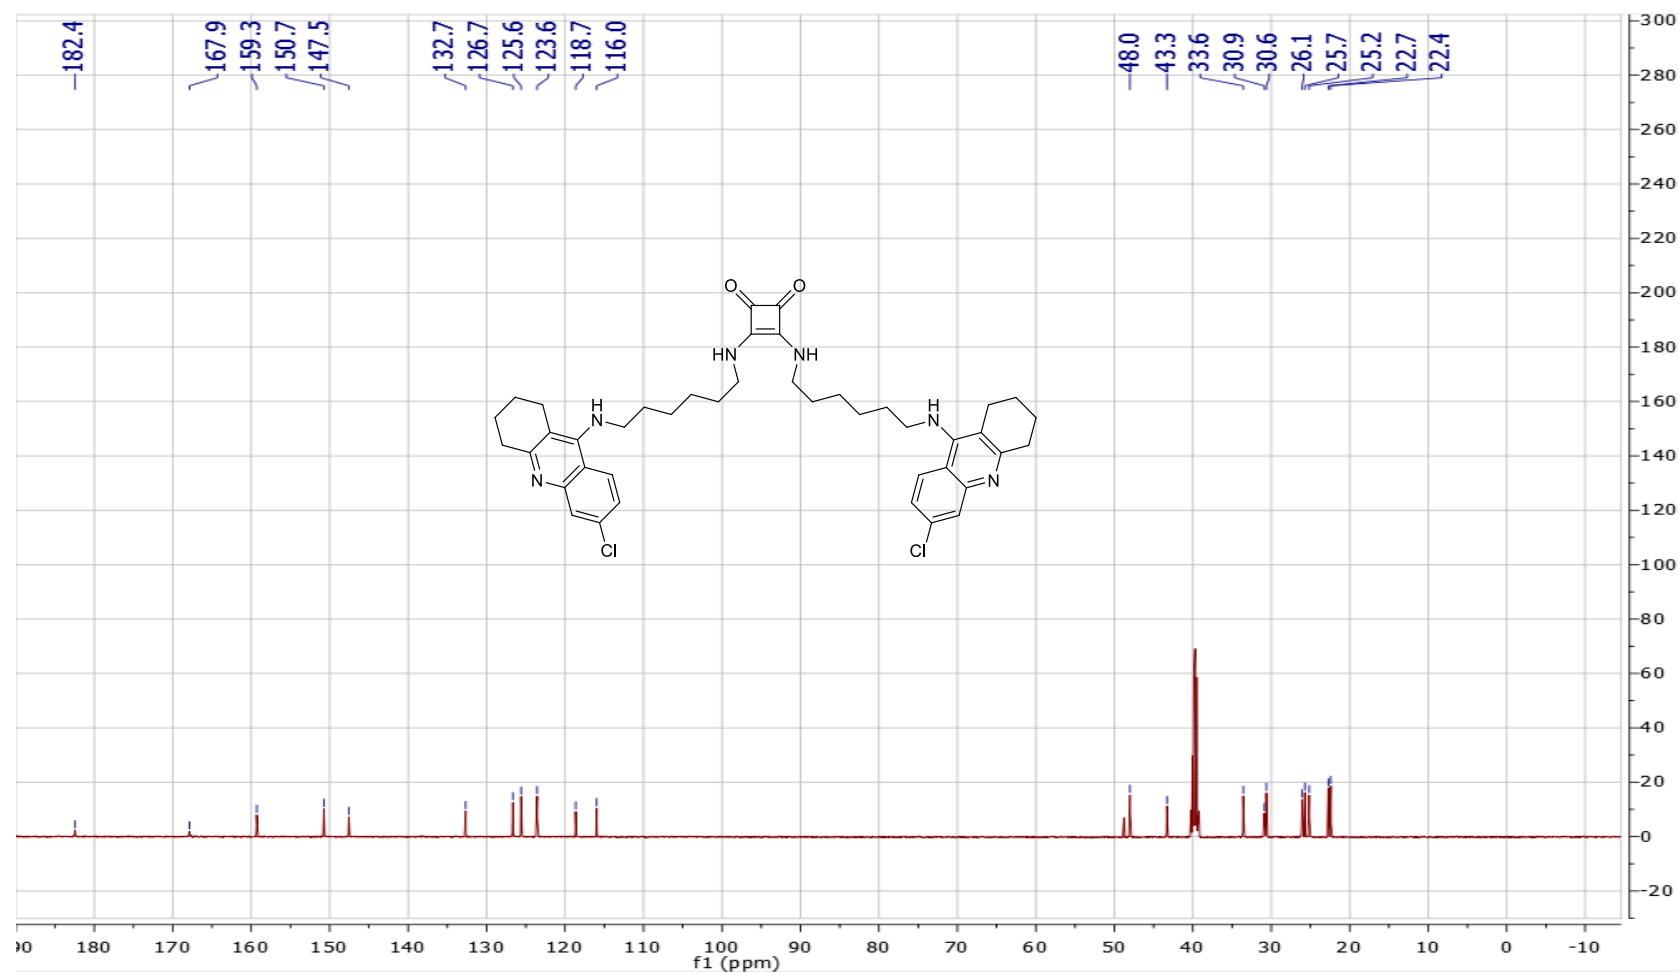

Bis({7-[(6-chloro-1,2,3,4-tetrahydroacridin-9-yl)amino]heptyl}amino)cyclobut-3-ene-1,2-dione (4f) <sup>1</sup>H NMR:

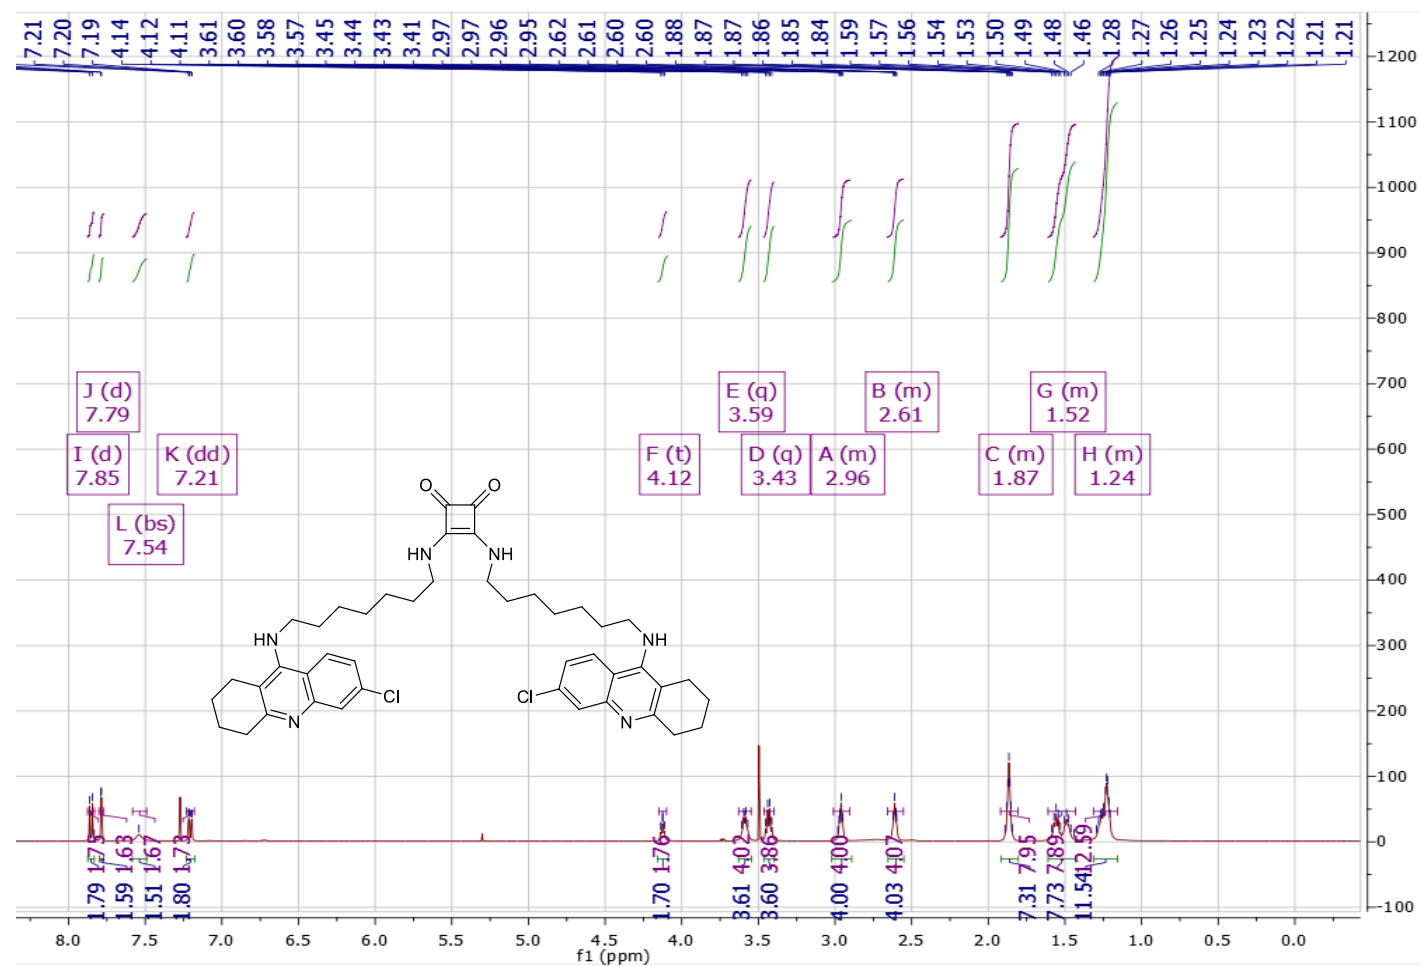

Bis({7-[(6-chloro-1,2,3,4-tetrahydroacridin-9-yl)amino]heptyl}amino)cyclobut-3-ene-1,2-dione (4f)  $^{13}\text{C}$  NMR:

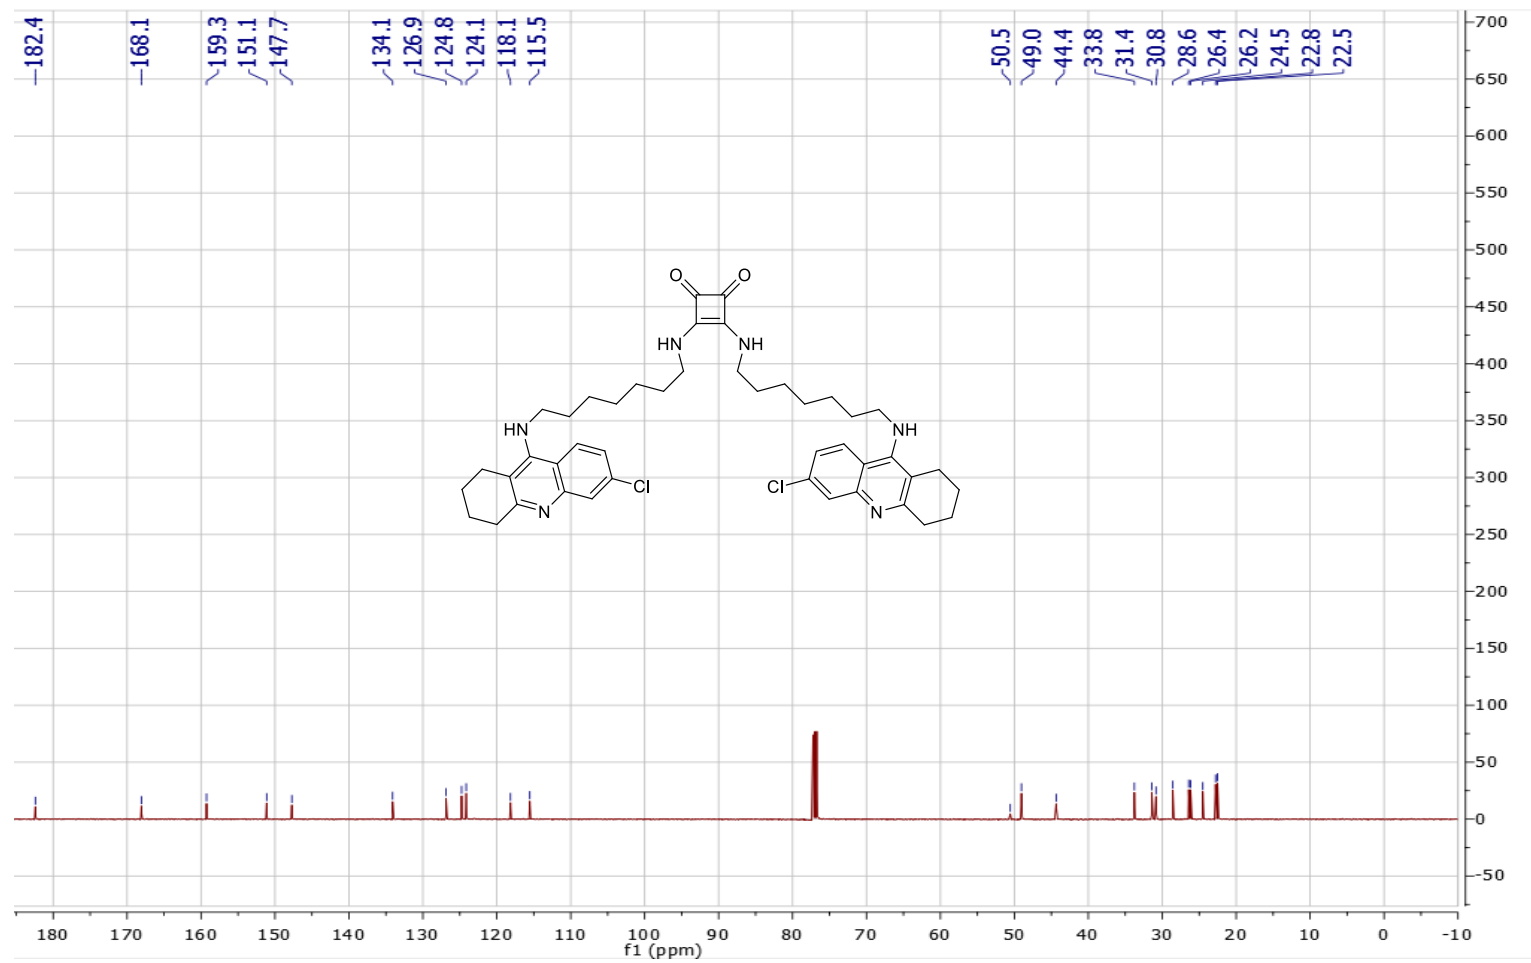

Bis({8-[(6-chloro-1,2,3,4-tetrahydroacridin-9-yl)amino]octyl}amino)cyclobut-3-ene-1,2-dione (4g) <sup>1</sup>H NMR:

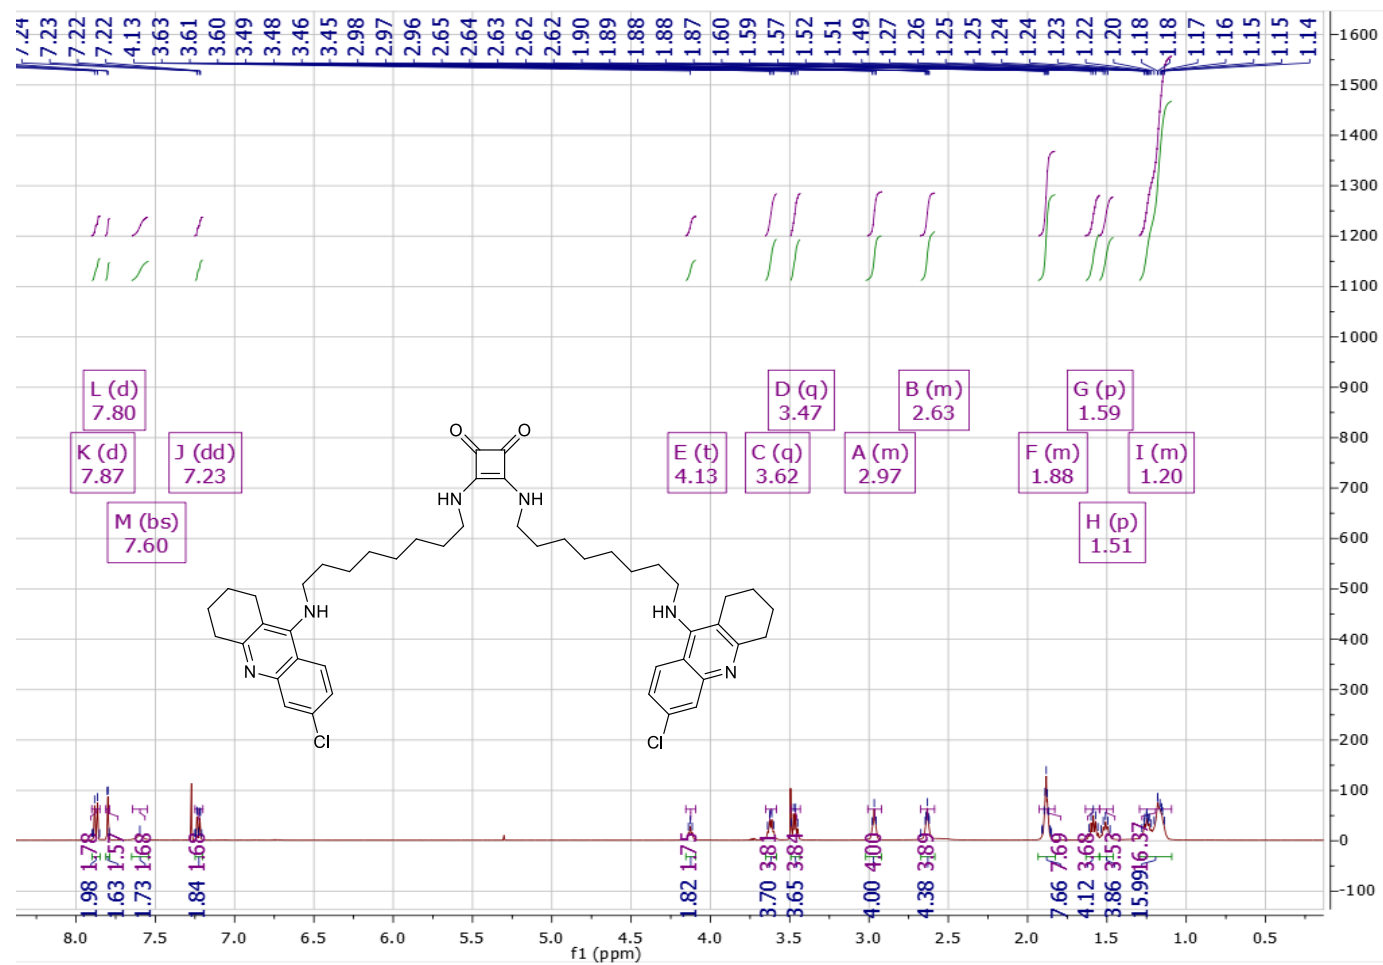

Bis({8-[(6-chloro-1,2,3,4-tetrahydroacridin-9-yl)amino]octyl}amino)cyclobut-3-ene-1,2-dione (4g) <sup>13</sup>C NMR:

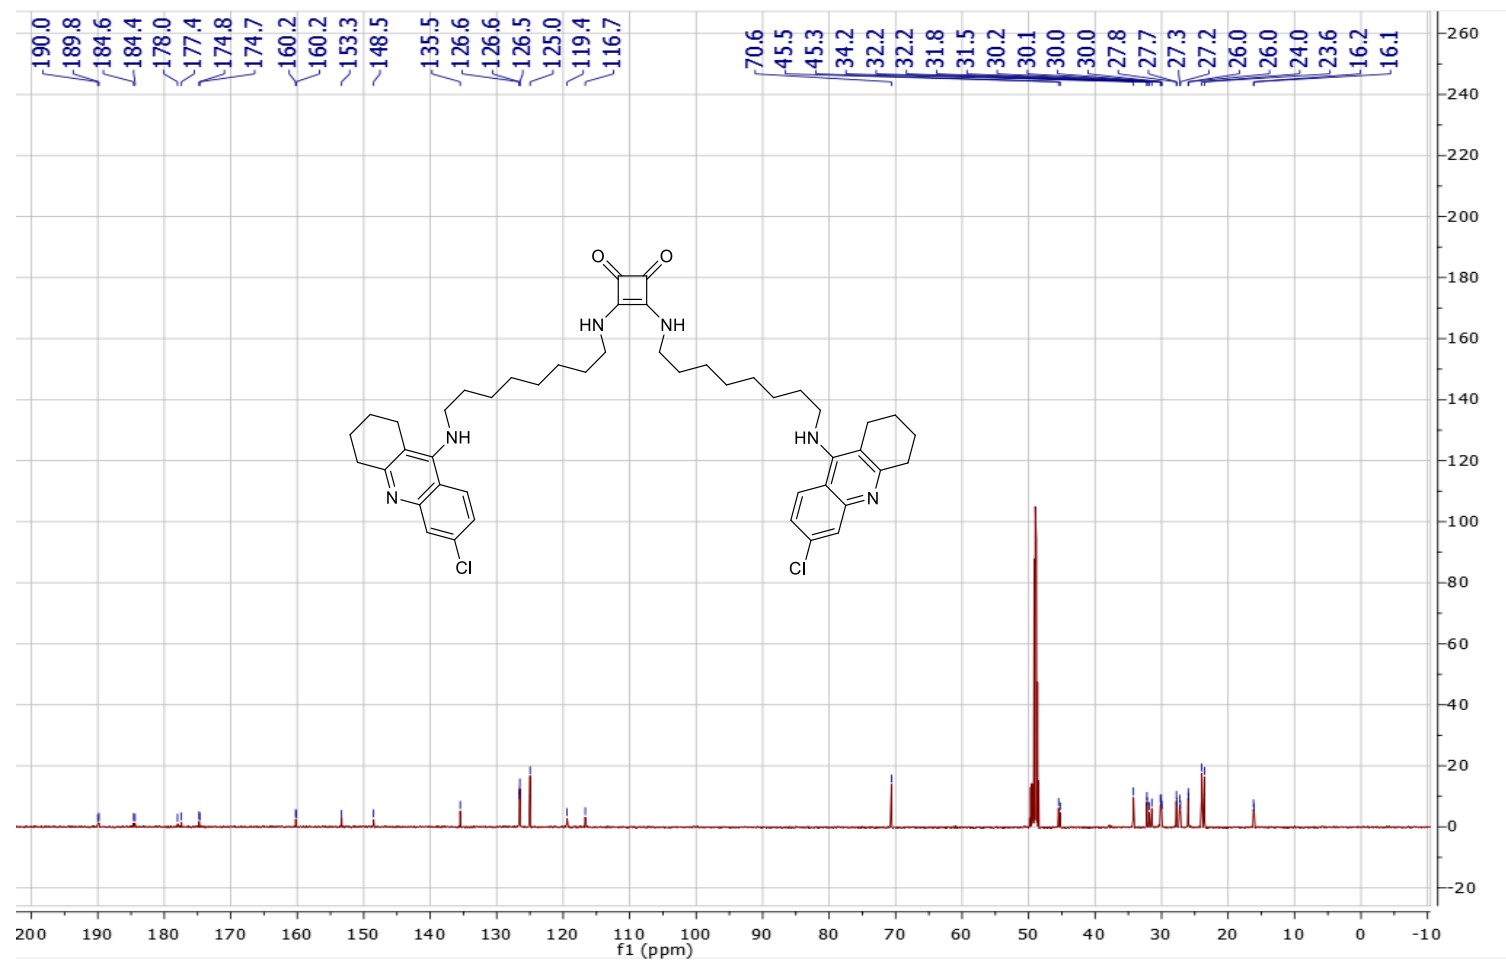

Bis({2-[(7-methoxy-1,2,3,4-tetrahydroacridin-9-yl)amino]ethyl}amino)cyclobut-3-ene-1,2-dione (5a) <sup>1</sup>H NMR:

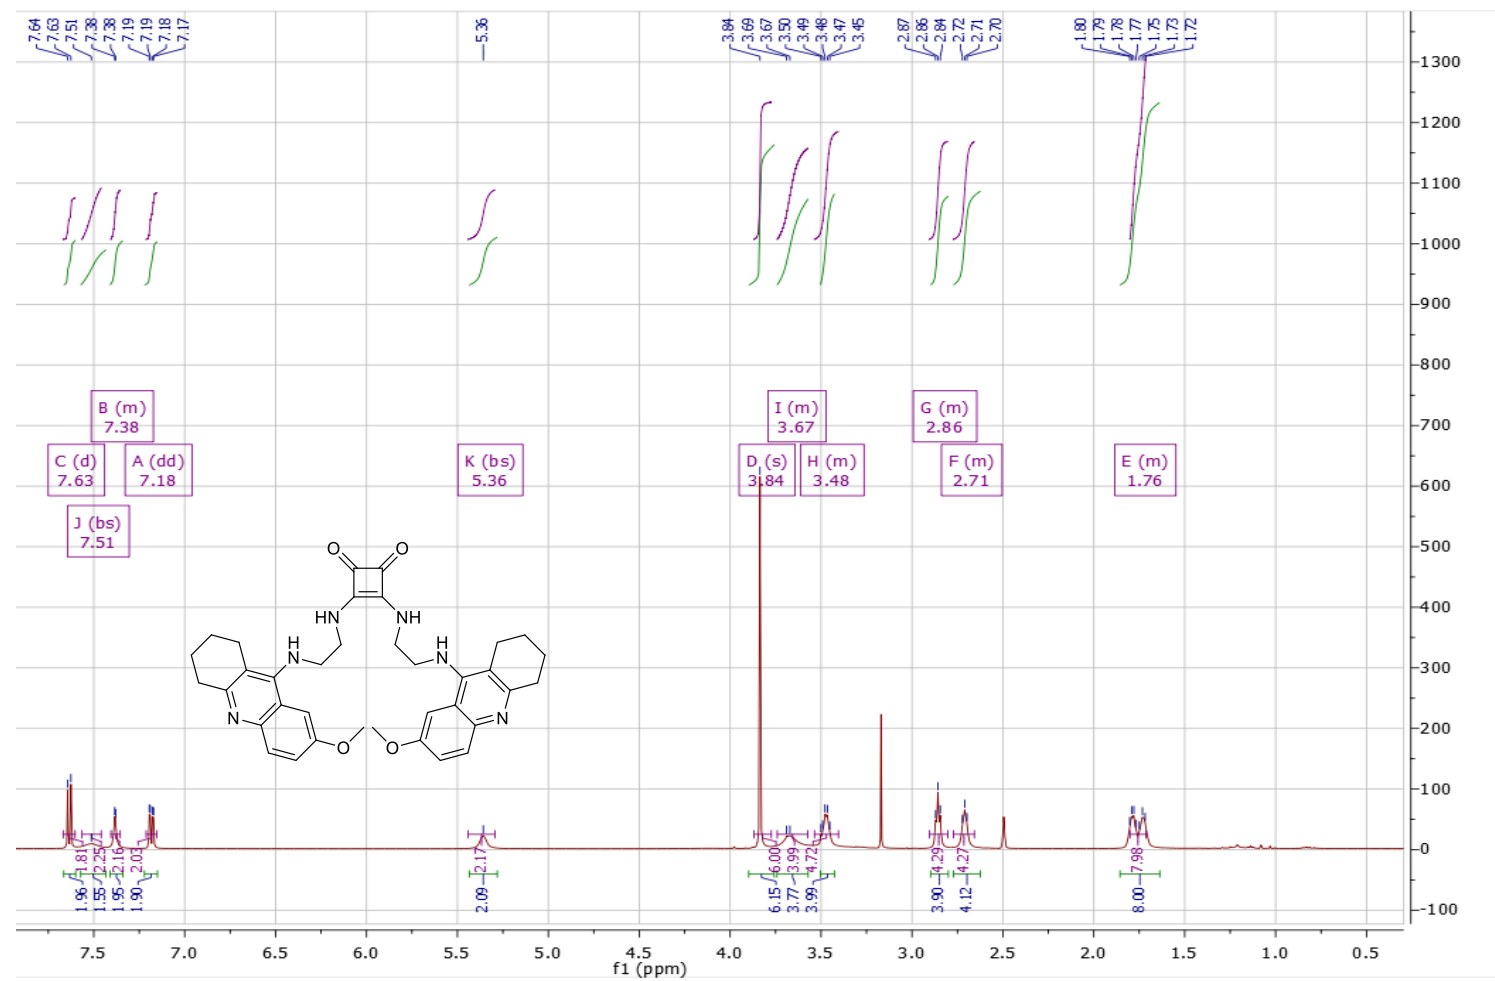

Bis(2-[(7-methoxy-1,2,3,4-tetrahydroacridin-9-yl)amino]ethyl)amino)cyclobut-3-ene-1,2-dione (5a) <sup>13</sup>C NMR:

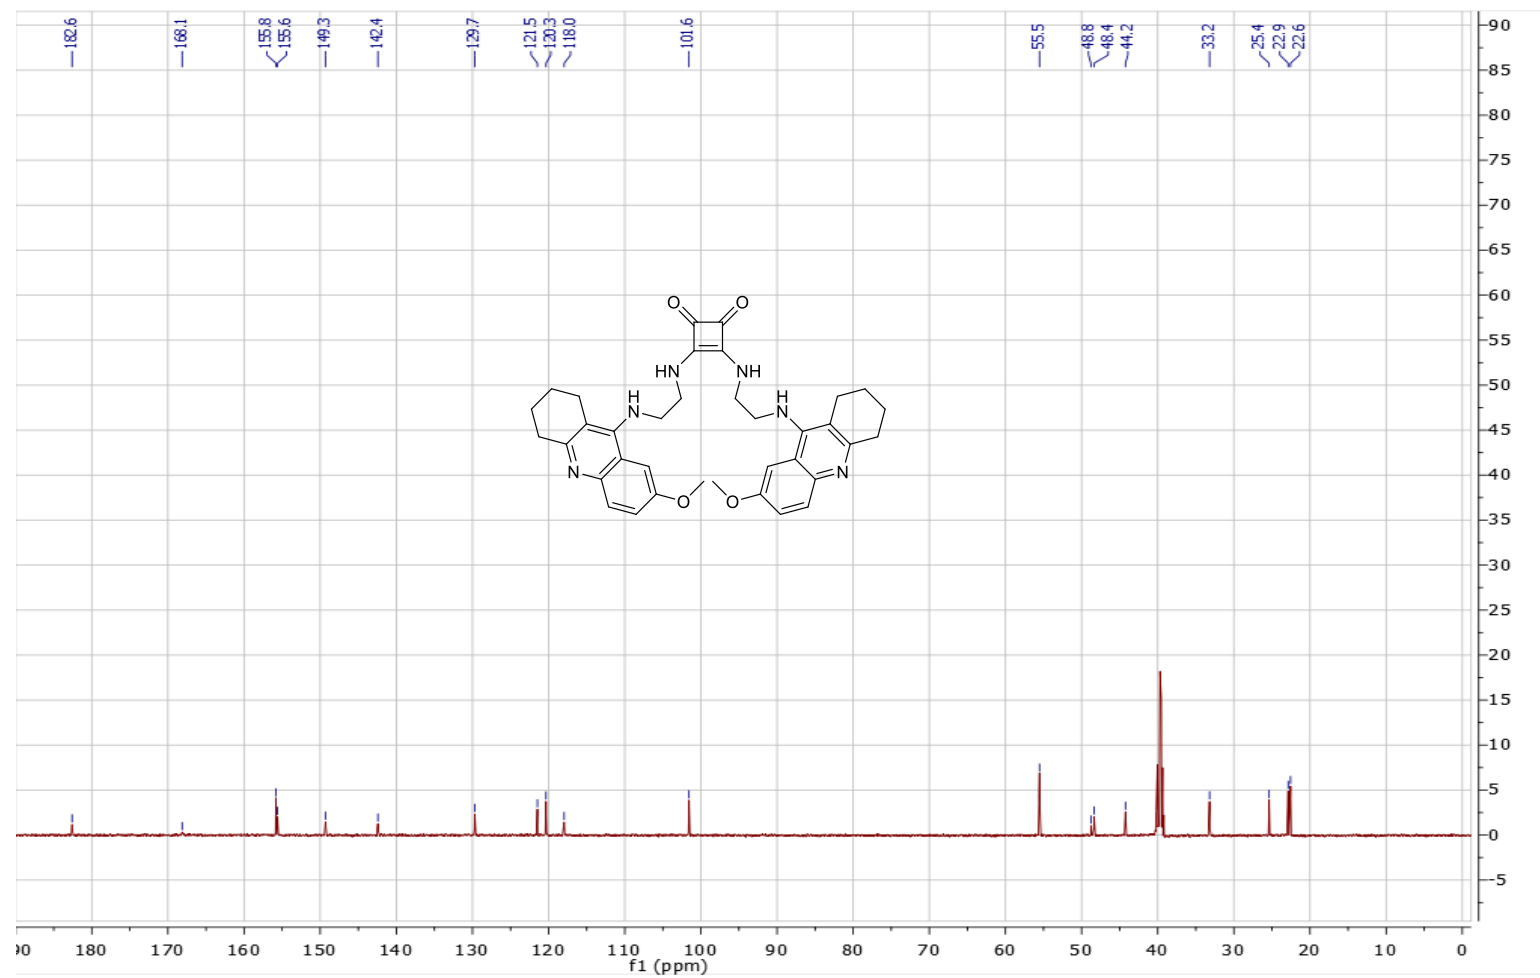

**Bis({3-[7-methoxy-1,2,3,4-tetrahydroacridin-9-yl]amino}propyl)amino)cyclobut-3-ene-1,2-dione (5b) <sup>1</sup>H NMR:**

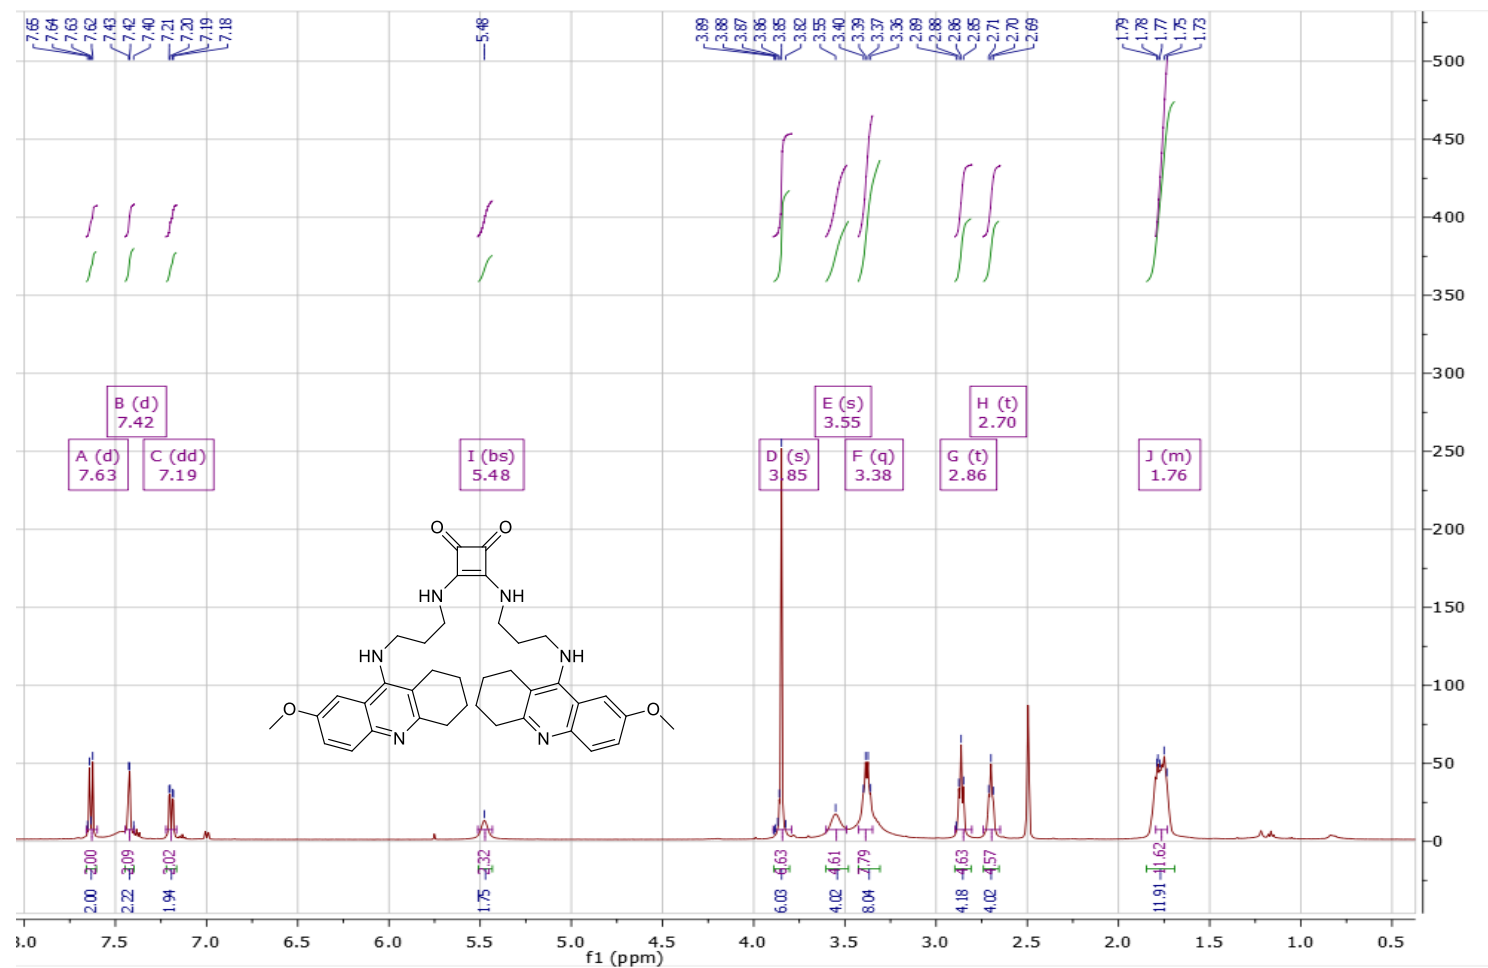



**Bis({3-[(7-methoxy-1,2,3,4-tetrahydroacridin-9-yl)amino]propyl}amino)cyclobut-3-ene-1,2-dione (5b) <sup>13</sup>C NMR:**

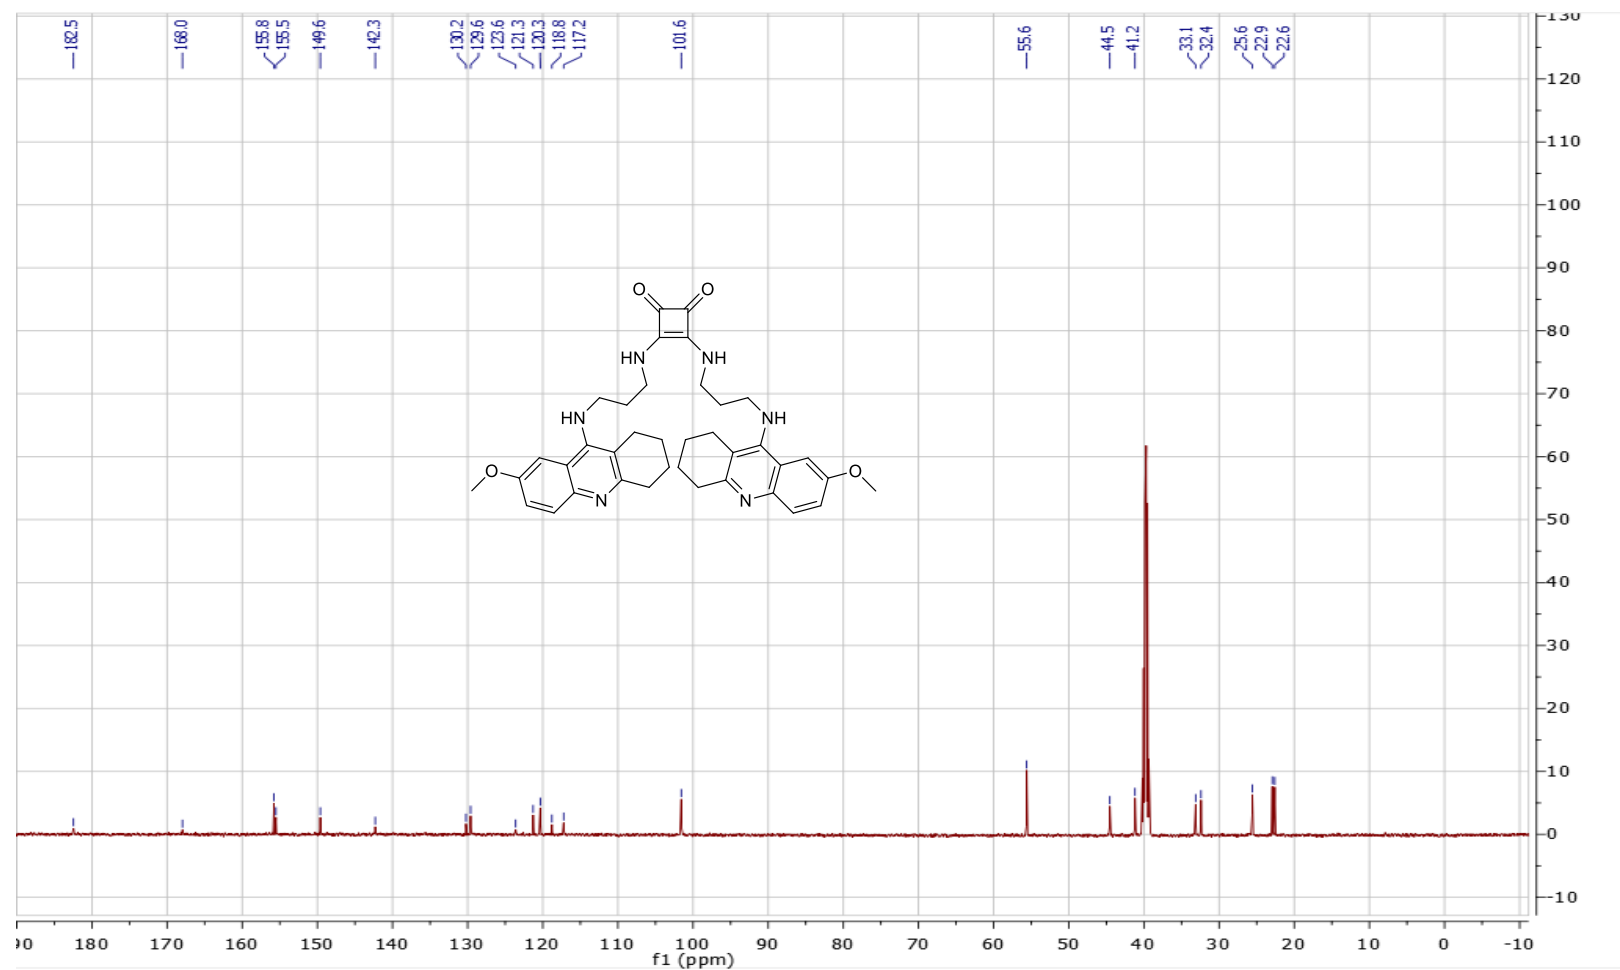

Bis(4-[(7-methoxy-1,2,3,4-tetrahydroacridin-9-yl)amino]butyl)amino)cyclobut-3-ene-1,2-dione (5c) <sup>1</sup>H NMR:

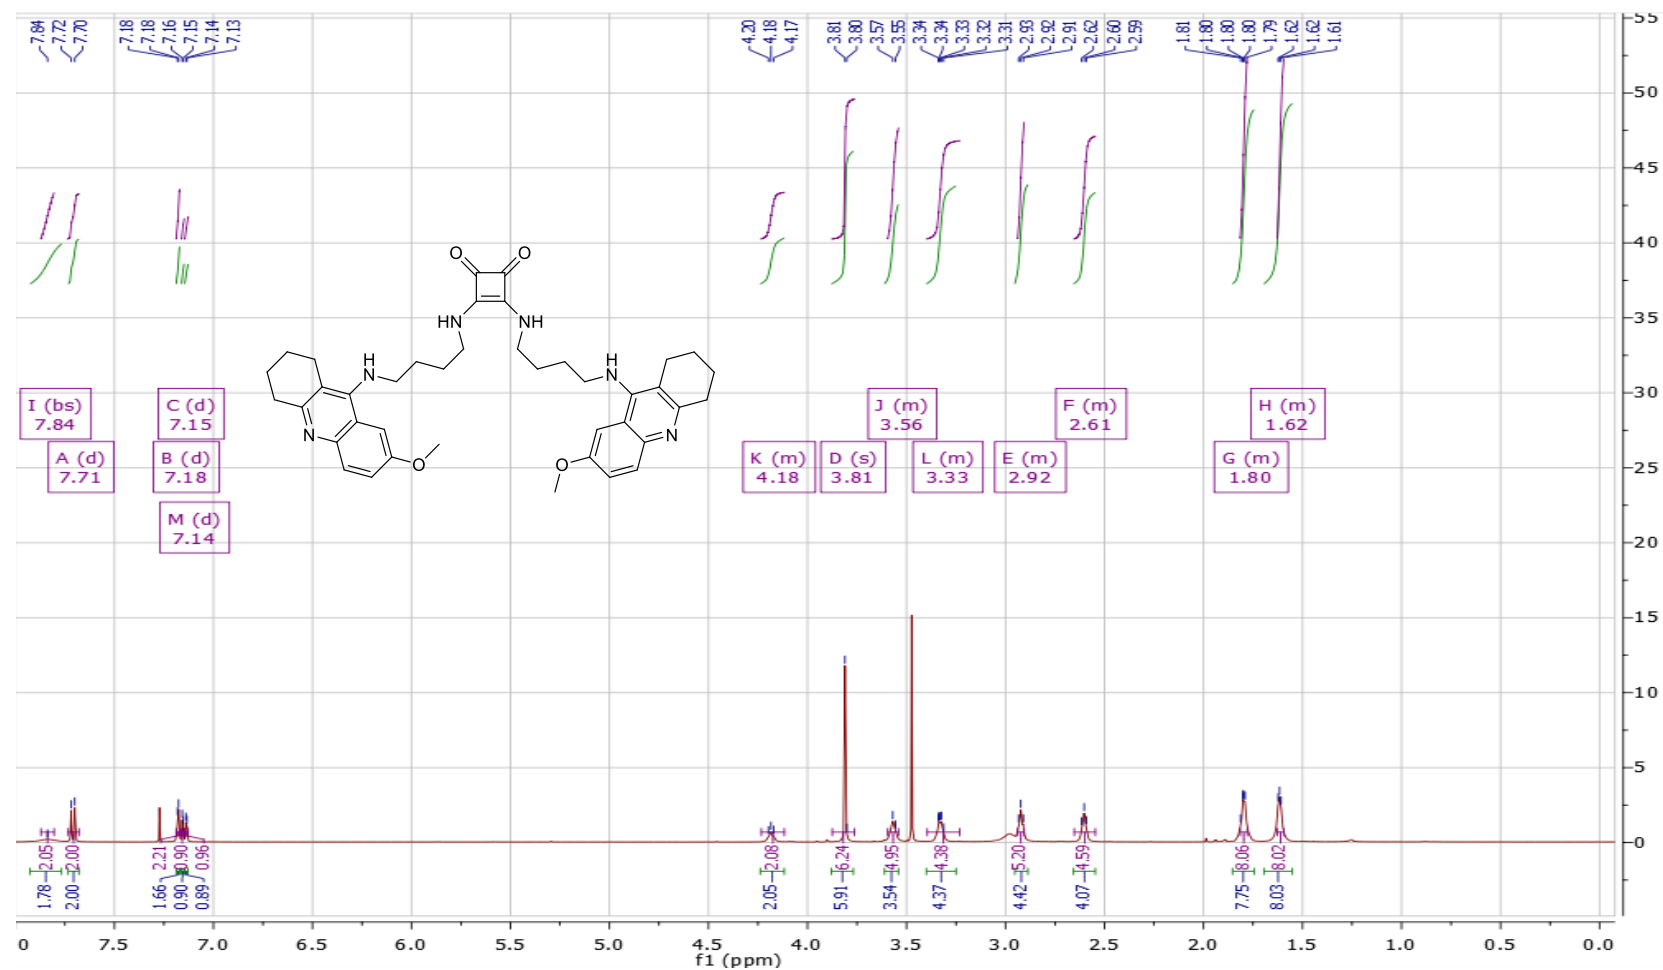

Bis({4-[7-methoxy-1,2,3,4-tetrahydroacridin-9-yl]amino}butyl)amino)cyclobut-3-ene-1,2-dione (5c) <sup>13</sup>C NMR:

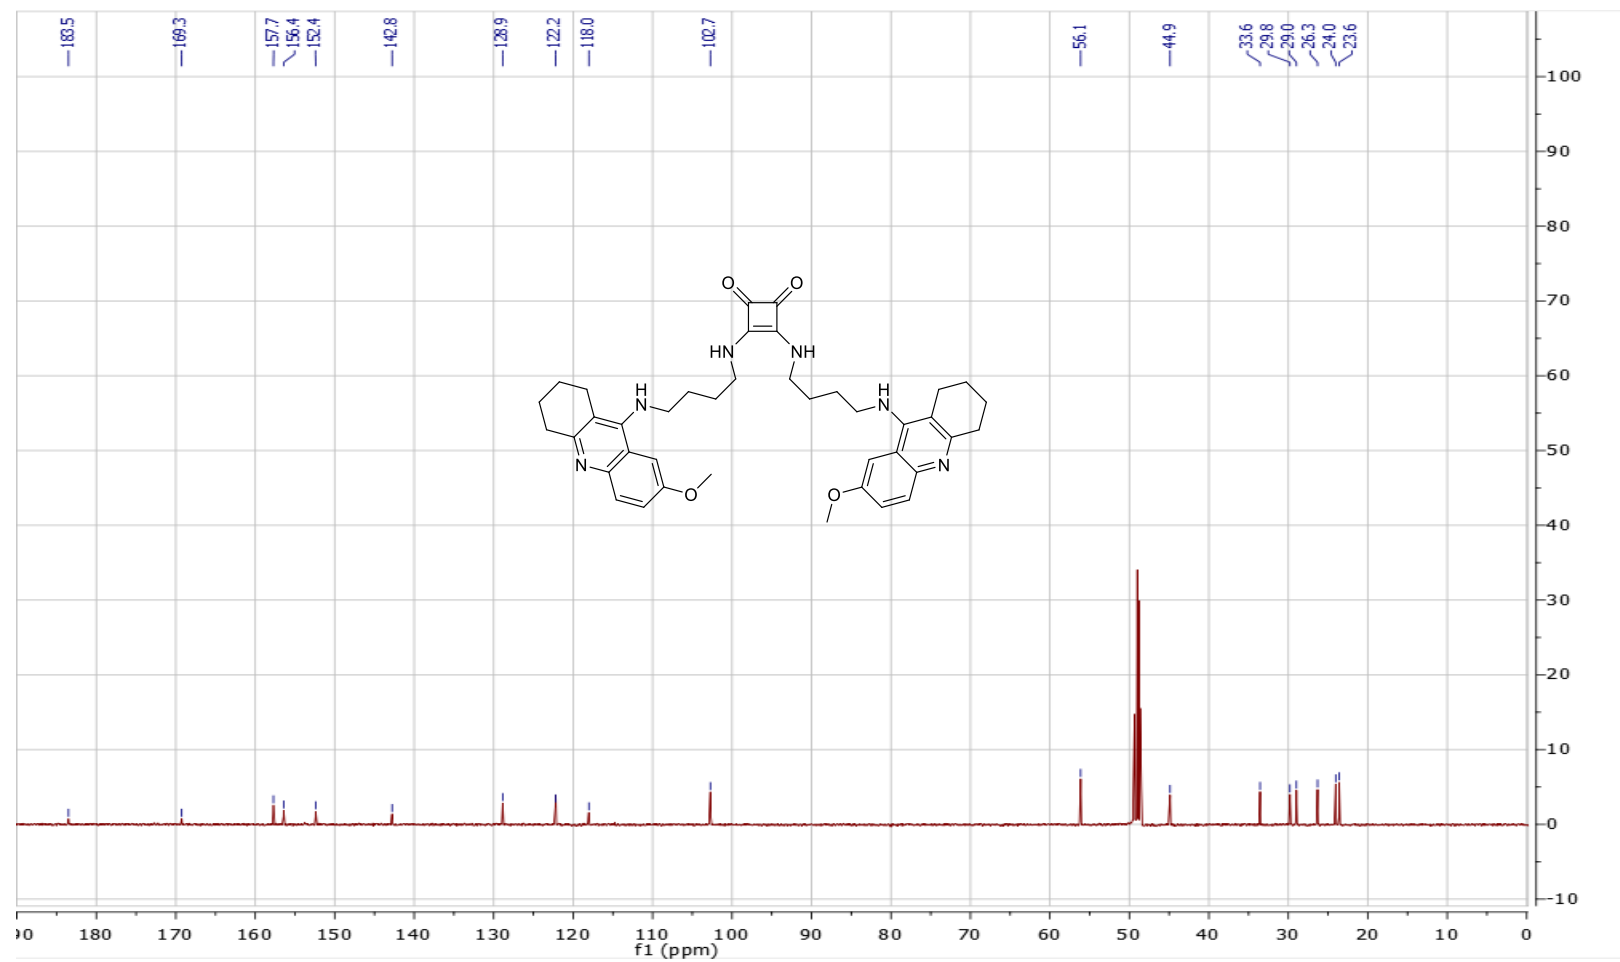

Bis({5-[7-methoxy-1,2,3,4-tetrahydroacridin-9-yl]amino}pentyl)amino)cyclobut-3-ene-1,2-dione (5d) <sup>1</sup>H NMR:

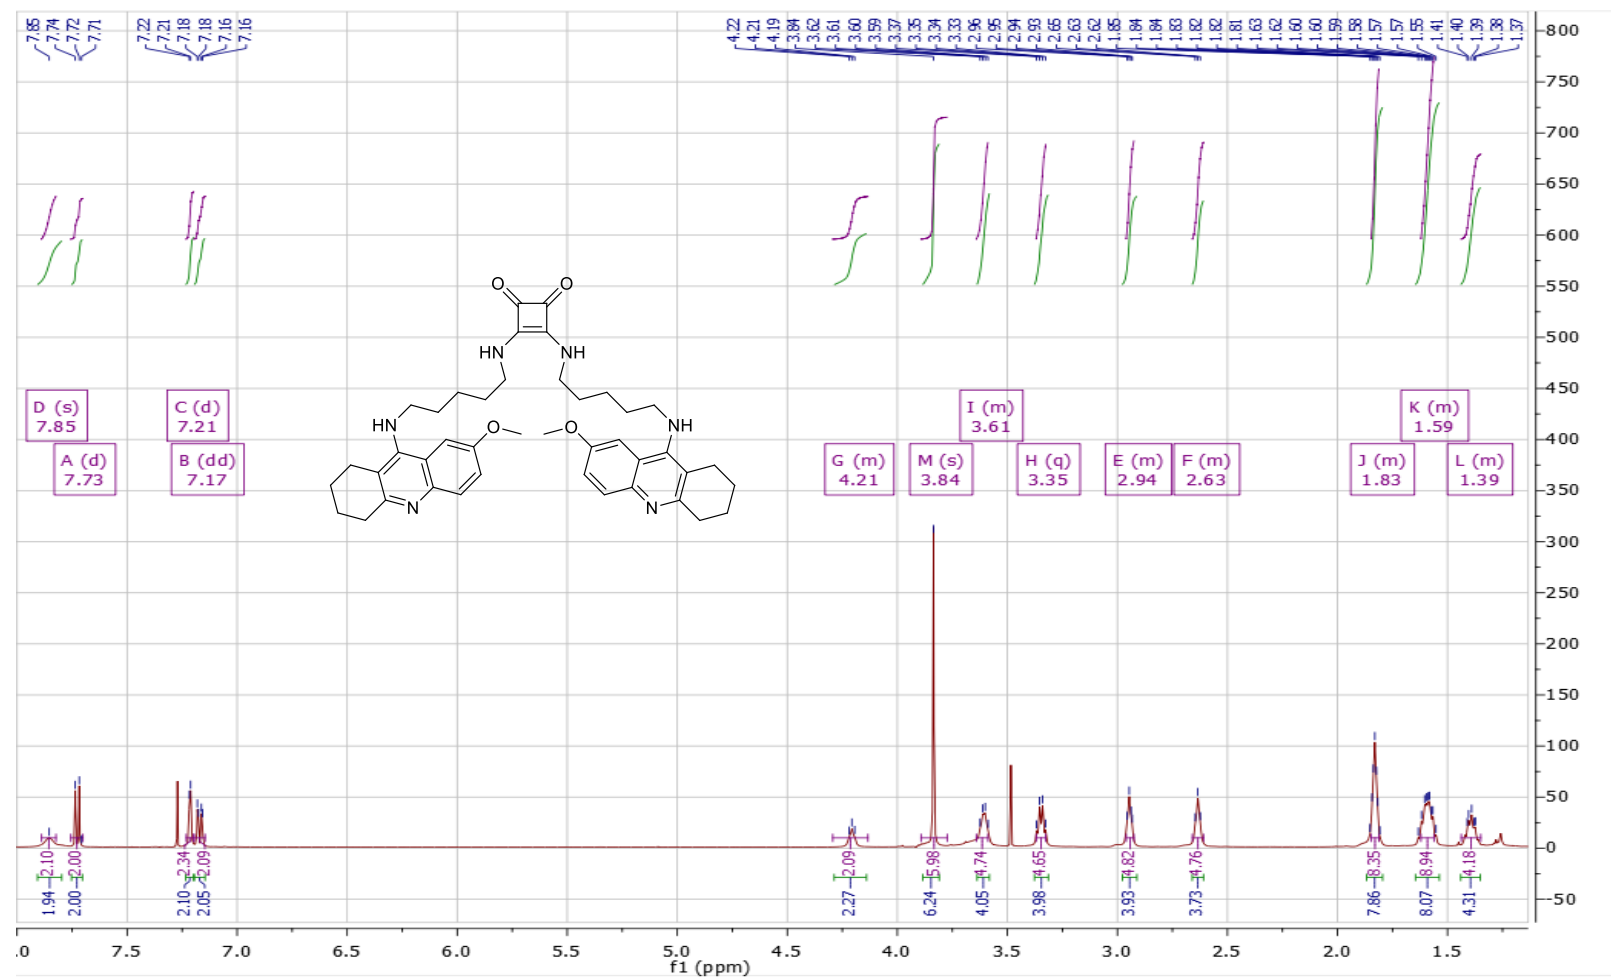

Bis({5-[(7-methoxy-1,2,3,4-tetrahydroacridin-9-yl)amino]pentyl}amino)cyclobut-3-ene-1,2-dione (5d) <sup>13</sup>C NMR:

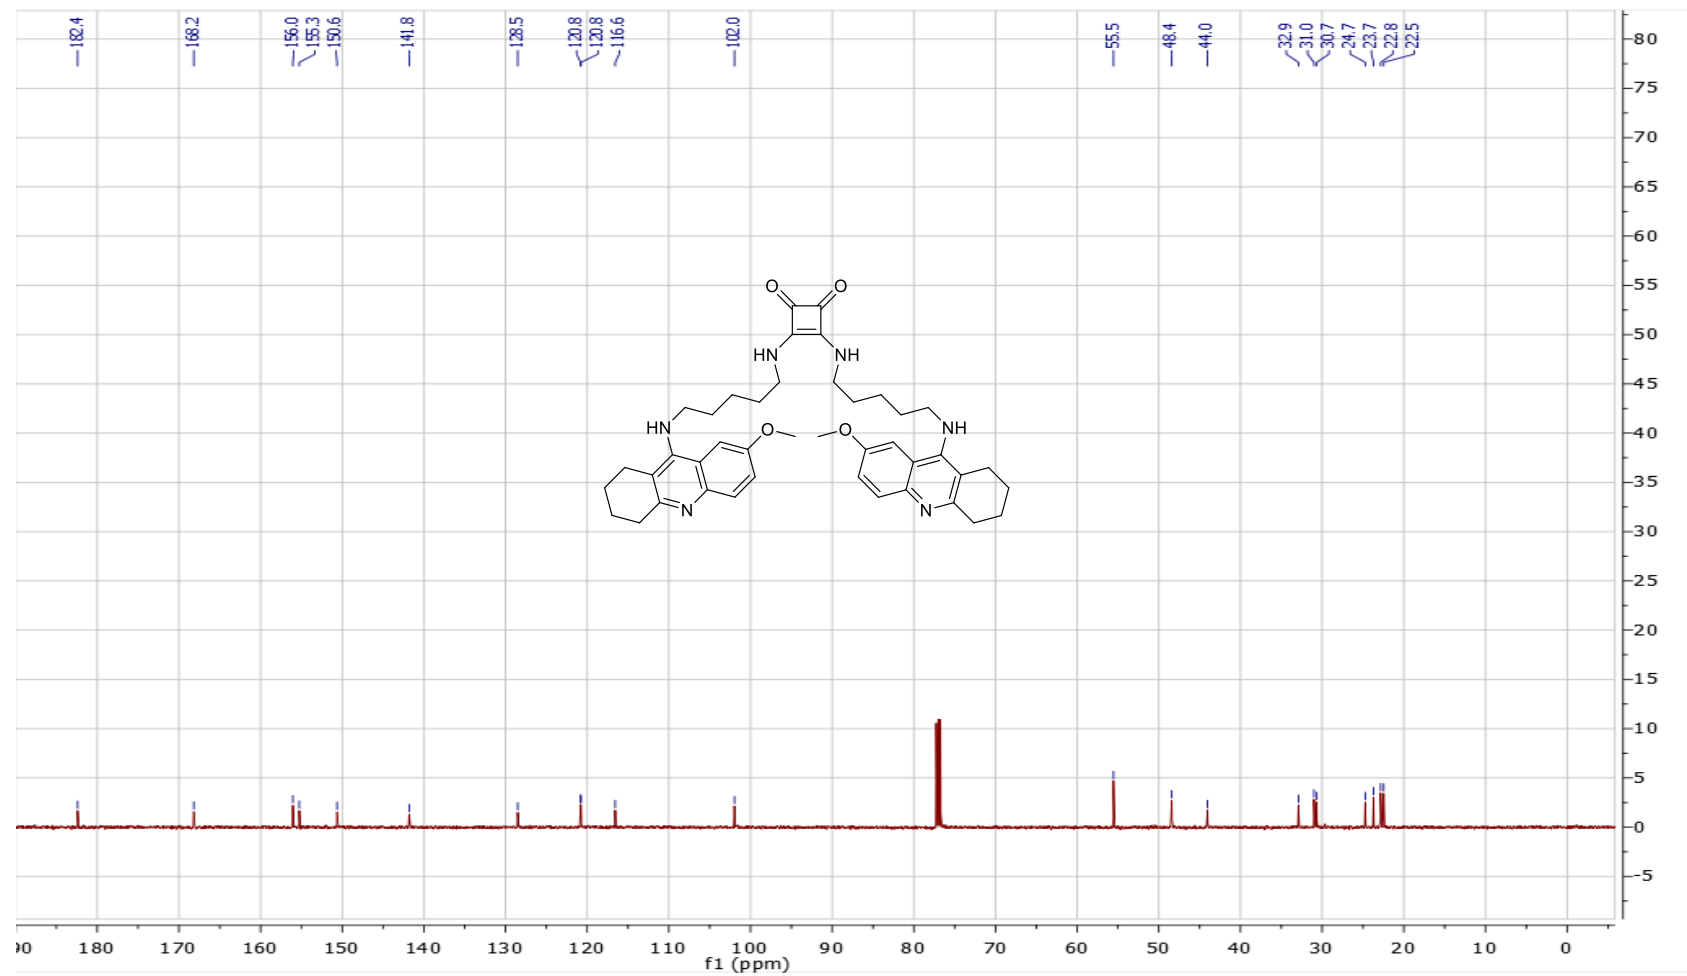

182.4

168.2

156.0

153.3

150.6

141.8

128.5

120.8

120.8

116.6

102.0

55.5

48.4

44.0

32.9

31.0

30.7

24.7

23.7

22.8

22.5

f1 (ppm)

Bis({6-[(7-methoxy-1,2,3,4-tetrahydroacridin-9-yl)amino]hexyl}amino)cyclobut-3-ene-1,2-dione (5e) <sup>1</sup>H NMR:

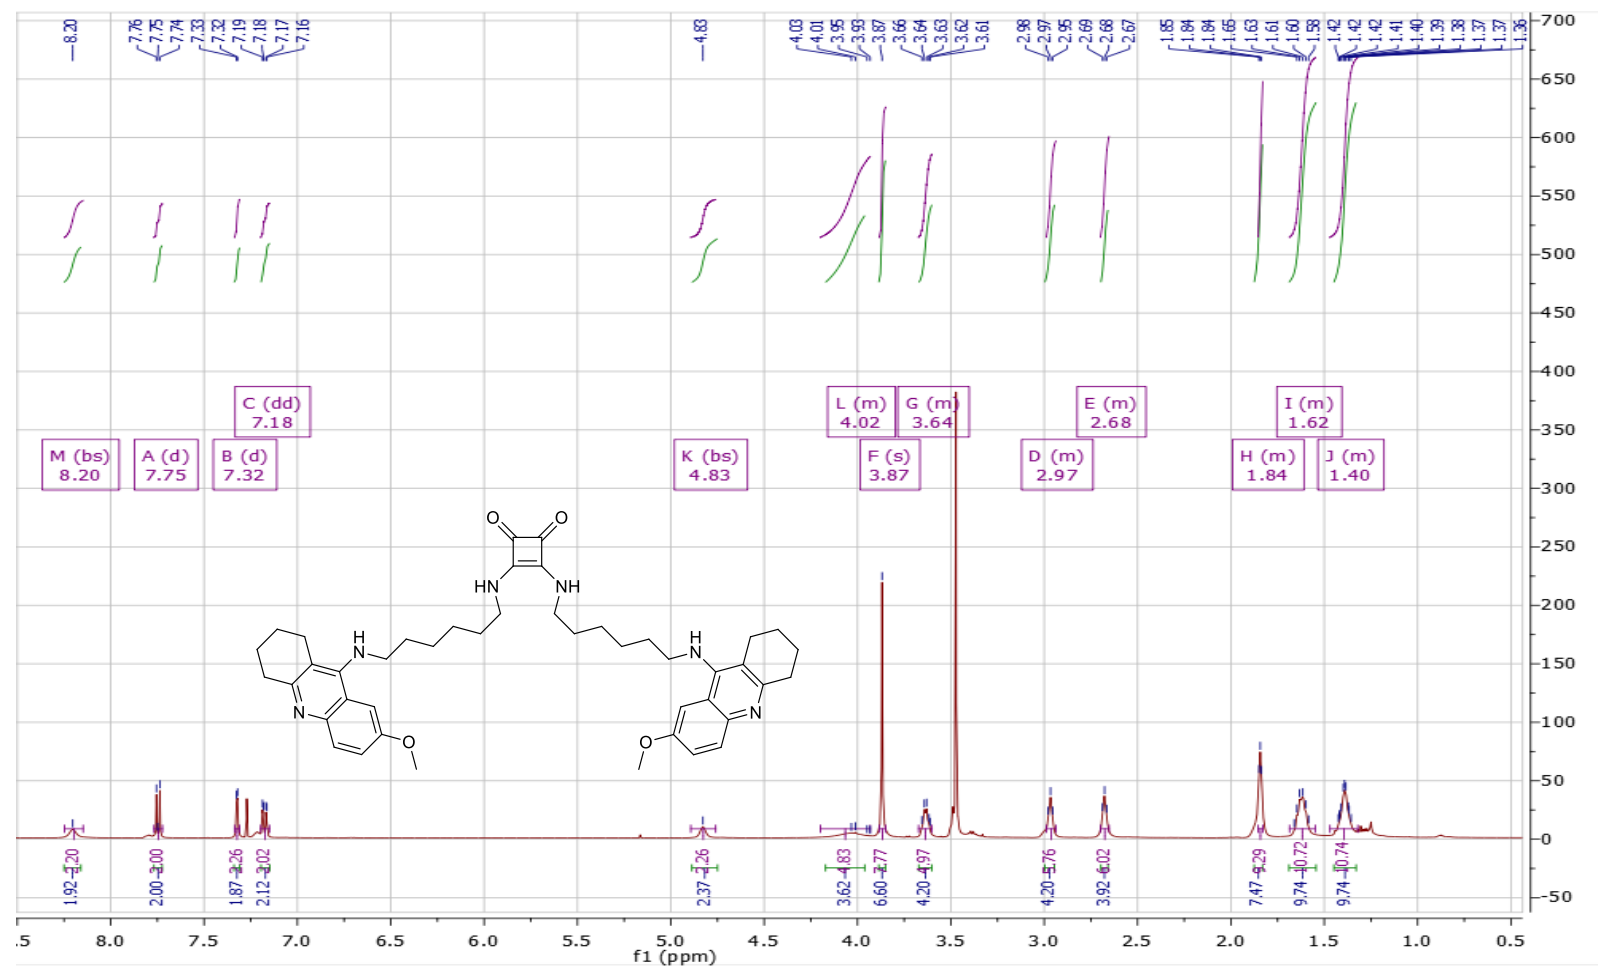

**Bis({6-[(7-methoxy-1,2,3,4-tetrahydroacridin-9-yl)amino]hexyl}amino)cyclobut-3-ene-1,2-dione (5e) <sup>13</sup>C NMR:**

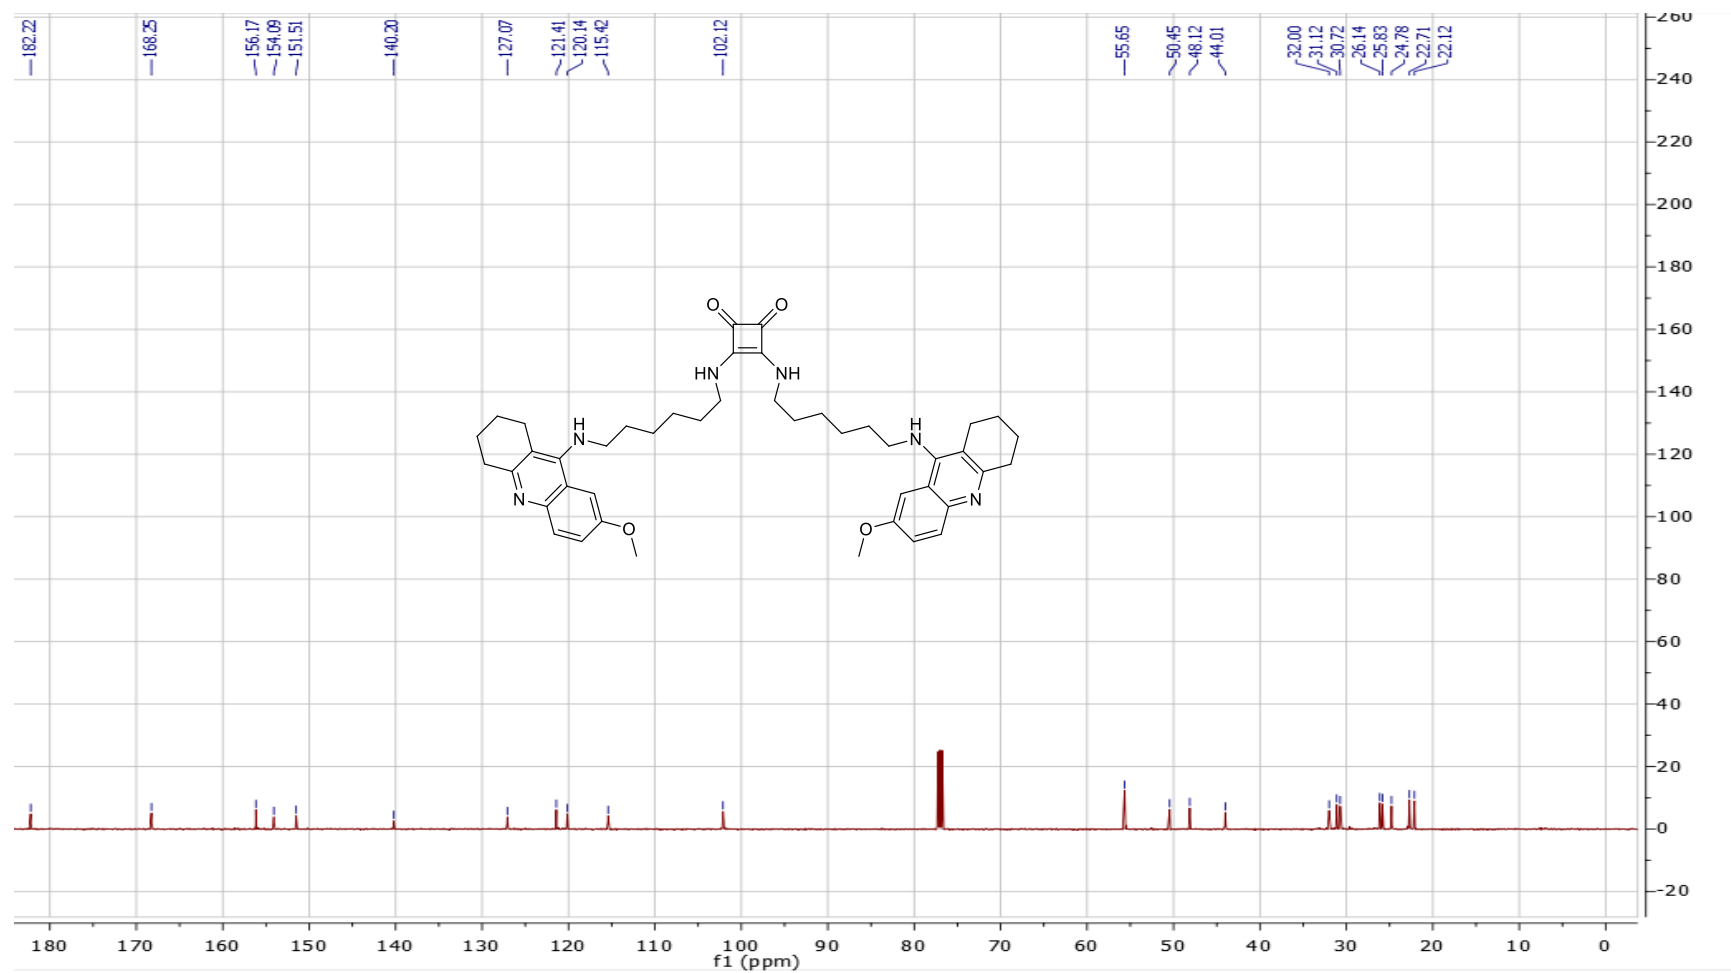

Bis({7-[(7-methoxy-1,2,3,4-tetrahydroacridin-9-yl)amino]heptyl}amino)cyclobut-3-ene-1,2-dione (5f) <sup>1</sup>H NMR:

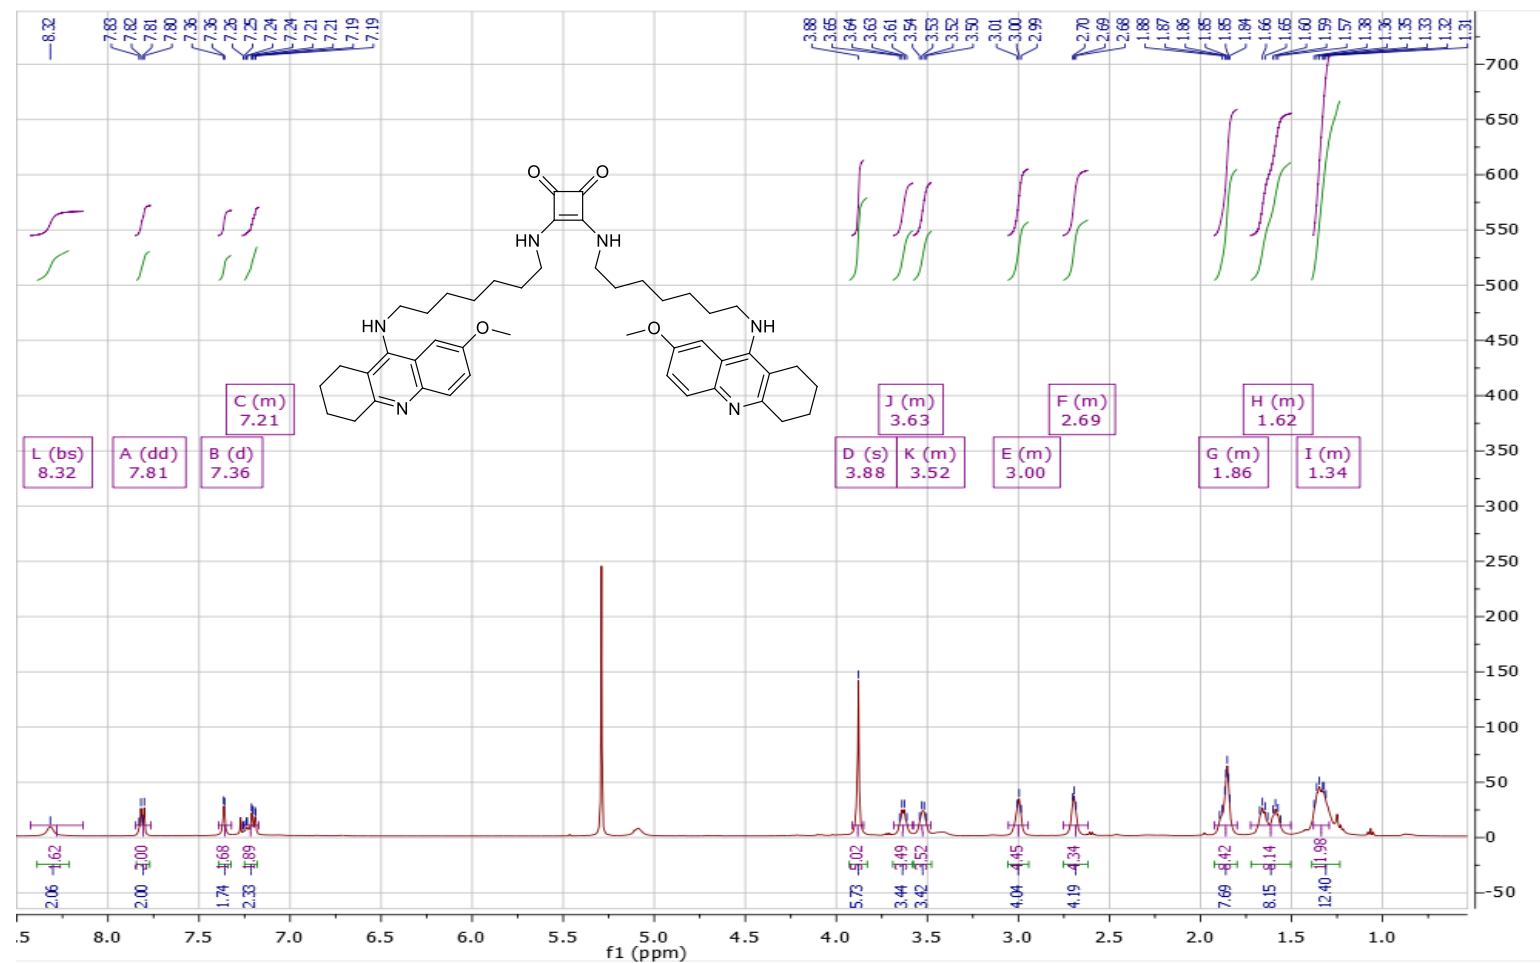



Bis({7-[(7-methoxy-1,2,3,4-tetrahydroacridin-9-yl)amino]heptyl}amino)cyclobut-3-ene-1,2-dione (5f) <sup>13</sup>C NMR:

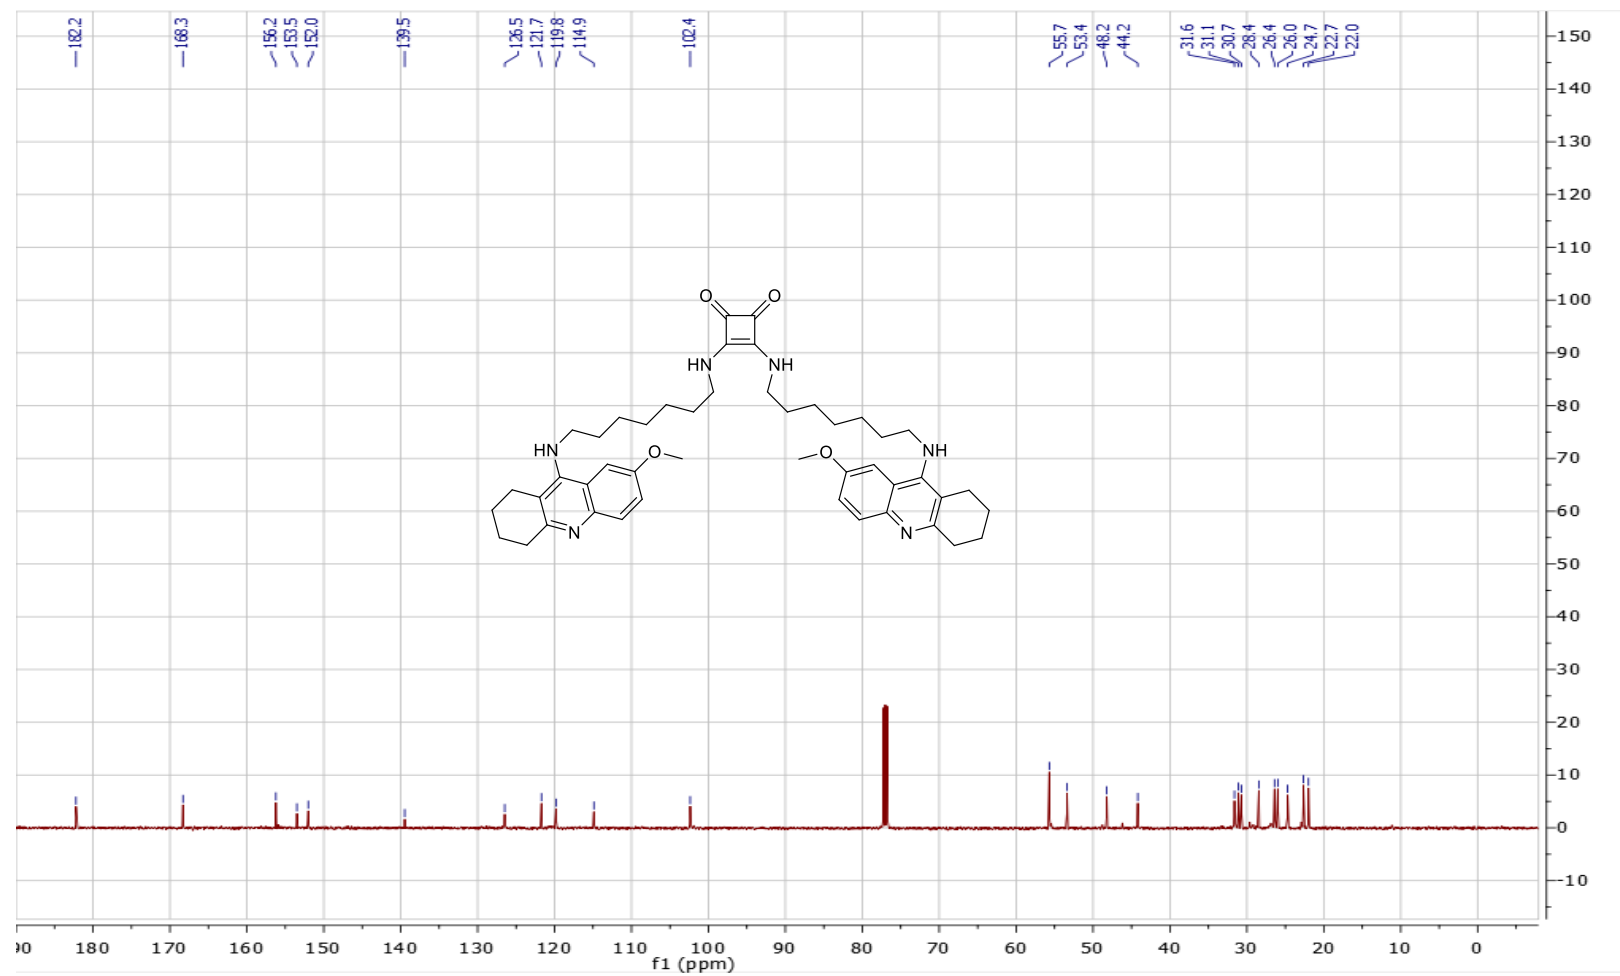

**Bis((8-[(7-methoxy-1,2,3,4-tetrahydroacridin-9-yl)amino]octyl)amino)cyclobut-3-ene-1,2-dione (5g) <sup>1</sup>H NMR:**

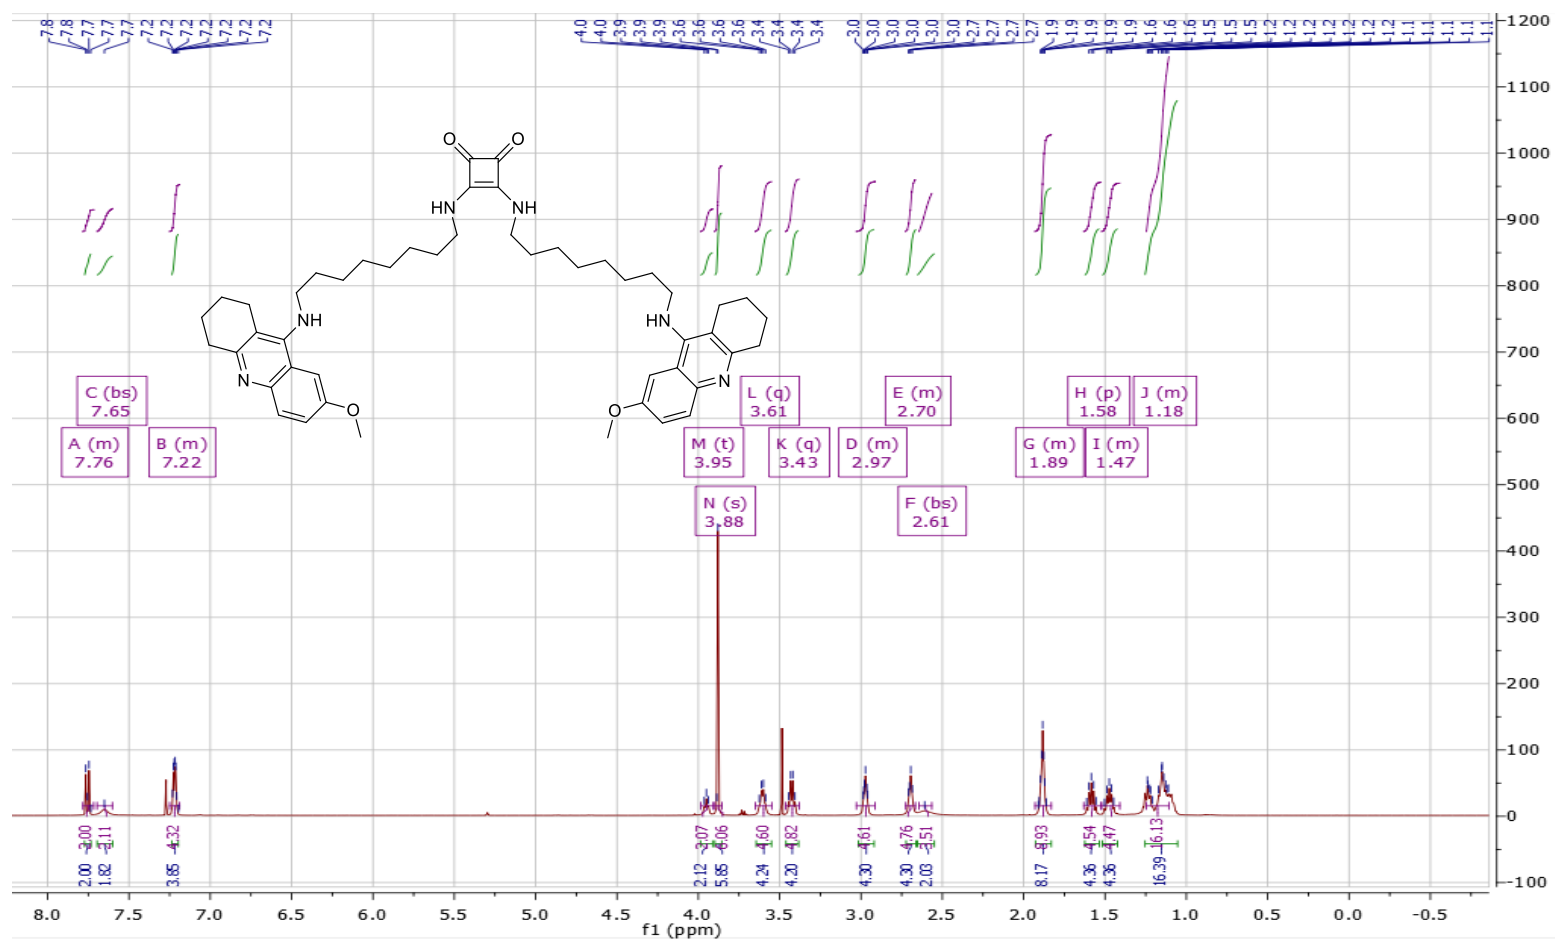

**Bis({8-[(7-methoxy-1,2,3,4-tetrahydroacridin-9-yl)amino]octyl}amino)cyclobut-3-ene-1,2-dione (5g) <sup>13</sup>C NMR:**

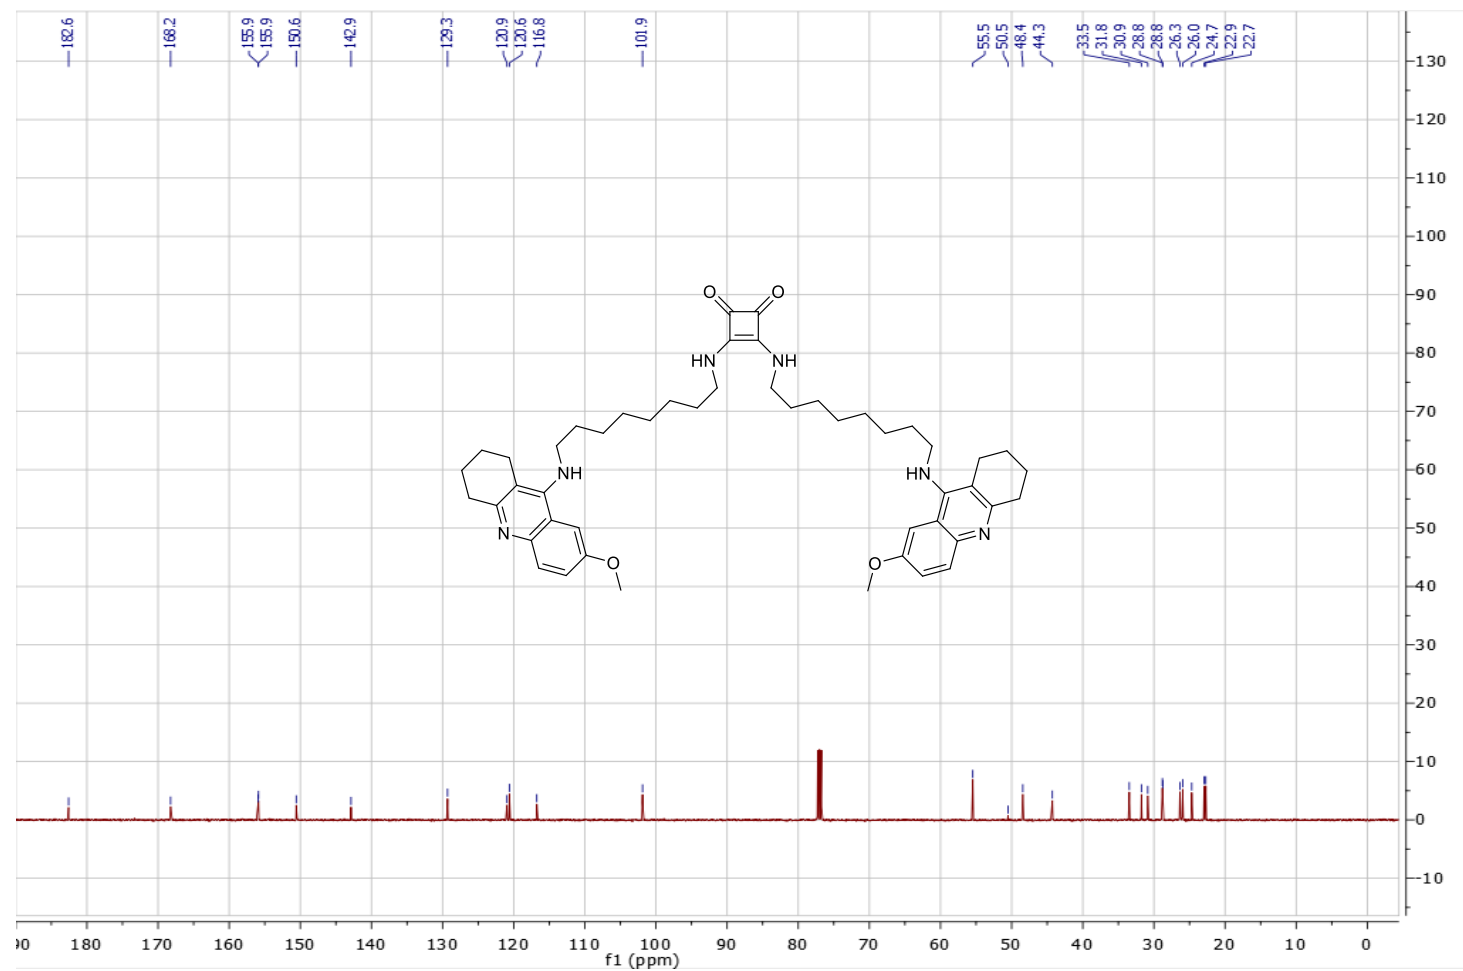

Supplement: biomolecules-09-00379-s001.pdf [file biomolecules-09-00379-s001.pdf]
